# Supplementary material for: Quantifying Trading Behavior in Financial Markets Using Google Trends
Source: PubMed Central journal article supplement — Sci Rep. 2013 Apr 25;3:1684. doi: 10.1038/srep01684 (PMC3635219; doi:10.1038/srep01684), 2013-04-25
Supplement: srep01684-s1.pdf [file srep01684-s1.pdf]

## TITLE

# *Supplementary Information:* Quantifying Trading Behavior in Financial Markets Using *Google Trends*

## AUTHORS AND AFFILIATIONS

Tobias Preis<sup>1#\*</sup>, Helen Susannah Moat<sup>2,3#</sup>, and H. Eugene Stanley<sup>2#</sup>

<sup>1</sup> Warwick Business School, University of Warwick,  
Scarman Road, Coventry, CV4 7AL, UK

<sup>2</sup> Department of Physics, Boston University,  
590 Commonwealth Avenue, Boston, Massachusetts 02215, USA

<sup>3</sup> Department of Civil, Environmental and Geomatic Engineering, UCL,  
Gower Street, London, WC1E 6BT, UK

# These authors contributed equally to this work.

\* To whom correspondence should be addressed; E-mail: [Tobias.Preis@wbs.ac.uk](mailto:Tobias.Preis@wbs.ac.uk)

**Search Volume Data** — The service *Google Trends* analyses a portion of *Google* web searches to compute how many searches have been done for specific terms, relative to the total number of searches done on *Google* over time. This analysis indicates the likelihood of a random user to search for a particular search term from a certain location at a certain time. Note that *Google Trends* only provides data relating to search terms for which traffic exceeds a certain threshold, so that those with low search volume will not appear. The *Google Trends* system also eliminates repeated queries from a single user over a short period of time, so that the level of interest is not artificially impacted by such behavior<sup>1</sup>. *Google Trends* does not provide search volume at a daily granularity, other than for extremely frequent search terms. We therefore conduct our analyses at a weekly granularity, for which data relating to a much larger set of search terms is available.

## REFERENCES

1. **Google Trends** [<http://support.google.com/trends>] Accessed in Mar 2013.

## FIGURES

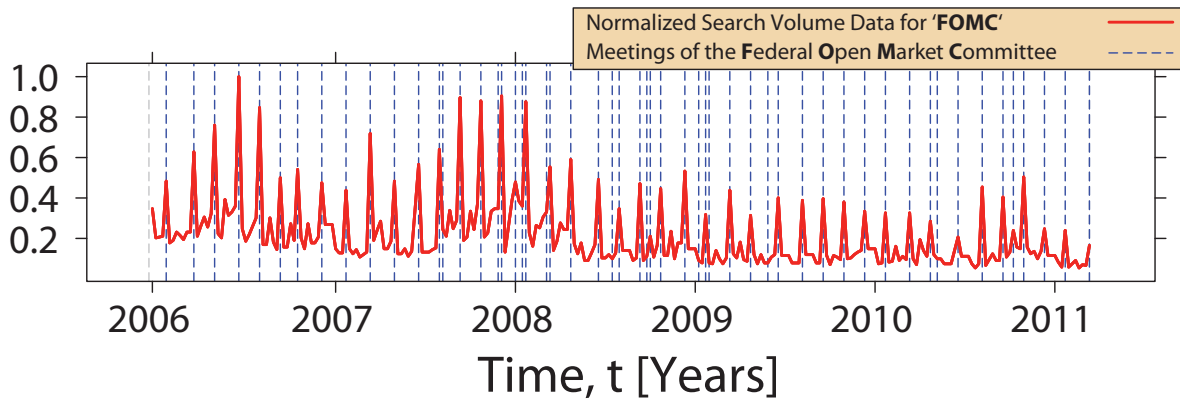

**Figure S1.** Empirical evidence of data consistency, based on normalized search volume data for the search term *FOMC*, which is the commonly used term for the *Federal Open Market Committee*. The time series is normalized by its maximum. This committee is part of the *U.S. Federal Reserve System* and makes core decisions during its regular meetings about interest rates and the increase of money supply. The meeting dates, which we retrieved from <http://www.federalreserve.gov/monetarypolicy/fomccalendars.htm> on 15 May 2011, are represented by vertical lines and coincide with an increase in the volume of the search term *FOMC*. We see no delay between sharp peaks in search volume data and the sequence of historical *FOMC* meeting dates.

Relative Keyword Occurrence [ $10^{-4}$ ]

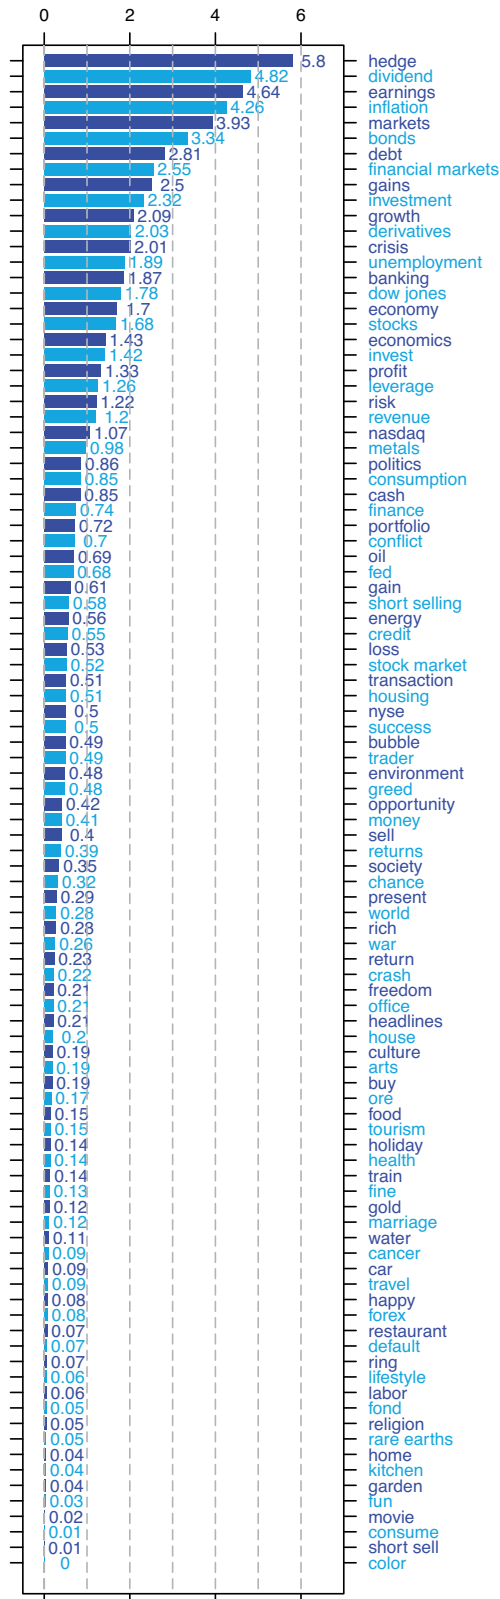

**Figure S2.** How related are search terms to the topic of finance? We quantify financial relevance by calculating the frequency of each search term in the online edition of the *Financial Times* (<http://www.ft.com>) from August 2004 to June 2011, normalized by the number of *Google* hits (<http://www.google.com>) for each search term.

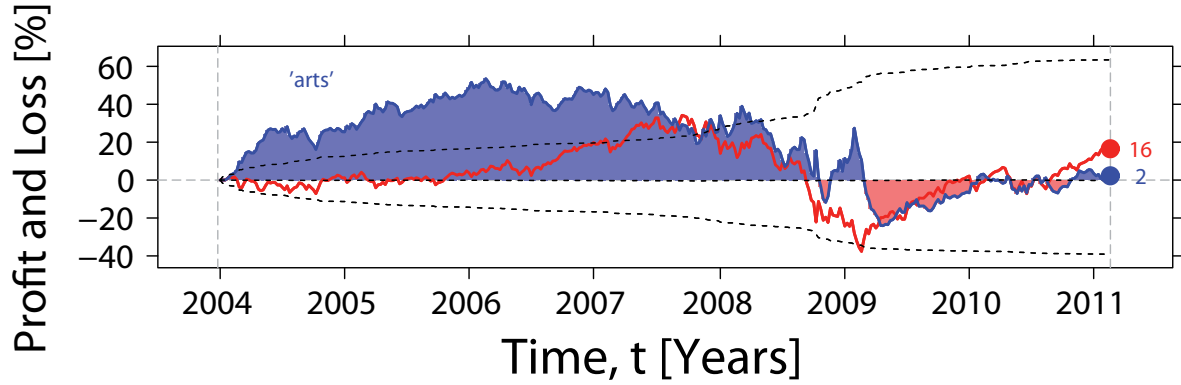

**Figure S3.** Profit and loss for an investment strategy based on the volume of the search term *arts* with  $\Delta t = 3$  weeks.

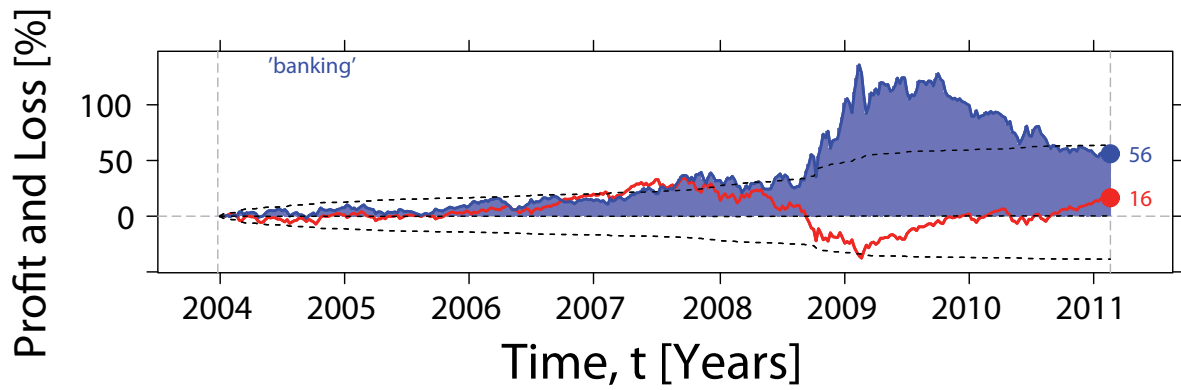

**Figure S4.** Profit and loss for an investment strategy based on the volume of the search term *banking* with  $\Delta t = 3$  weeks.

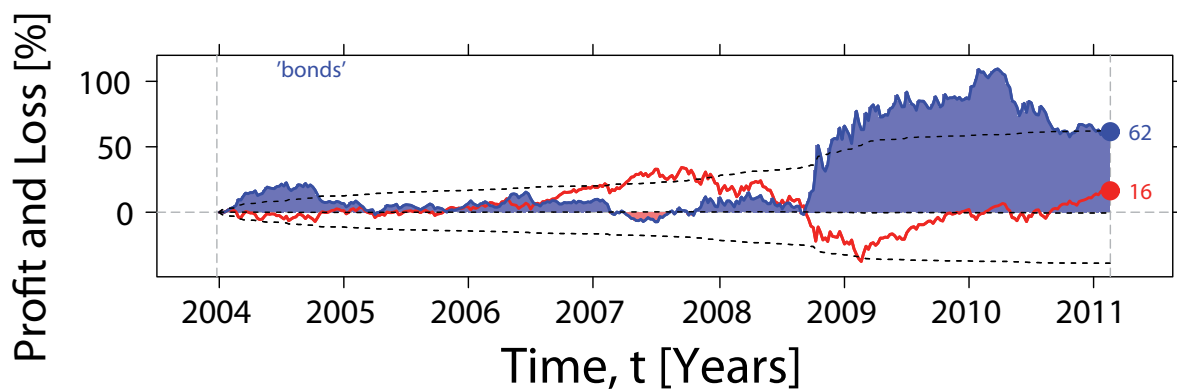

**Figure S5.** Profit and loss for an investment strategy based on the volume of the search term *bonds* with  $\Delta t = 3$  weeks.

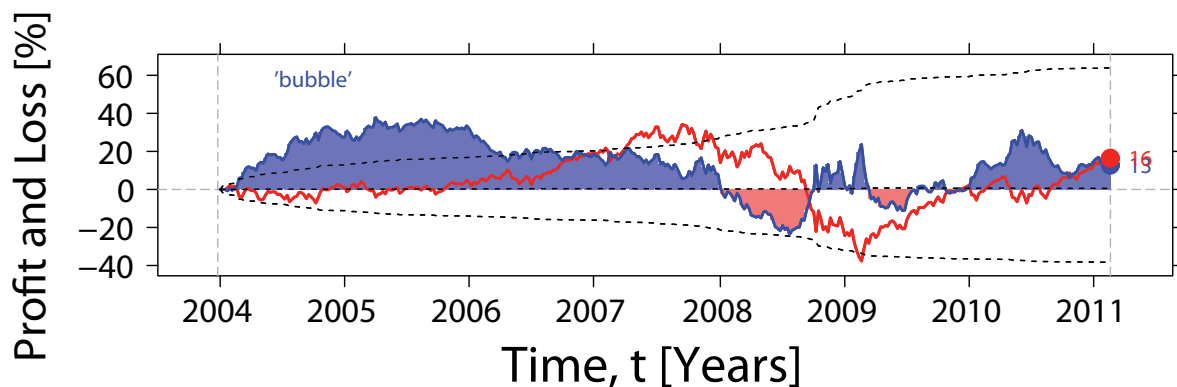

**Figure S6.** Profit and loss for an investment strategy based on the volume of the search term *bubble* with  $\Delta t = 3$  weeks.

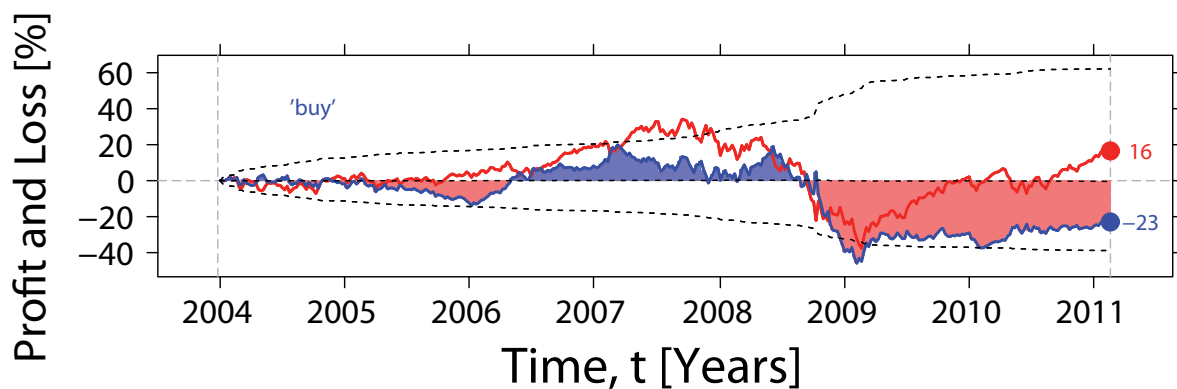

**Figure S7.** Profit and loss for an investment strategy based on the volume of the search term *buy* with  $\Delta t = 3$  weeks.

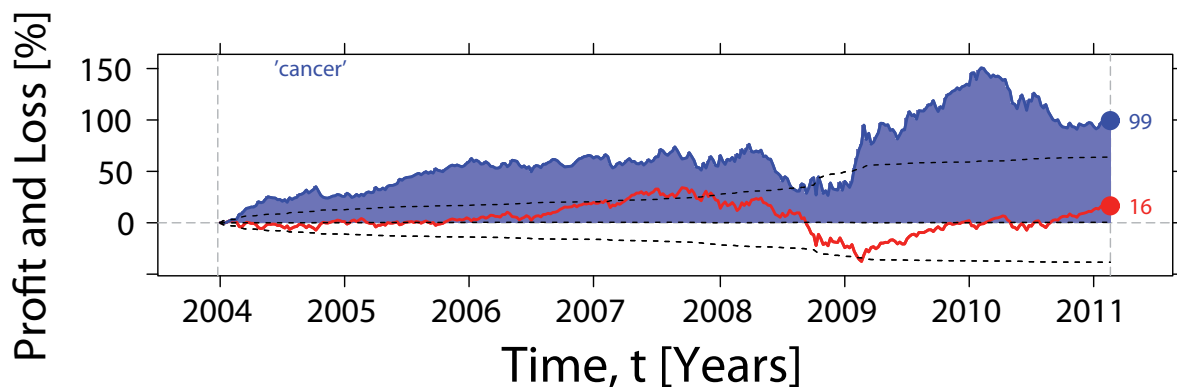

**Figure S8.** Profit and loss for an investment strategy based on the volume of the search term *cancer* with  $\Delta t = 3$  weeks.

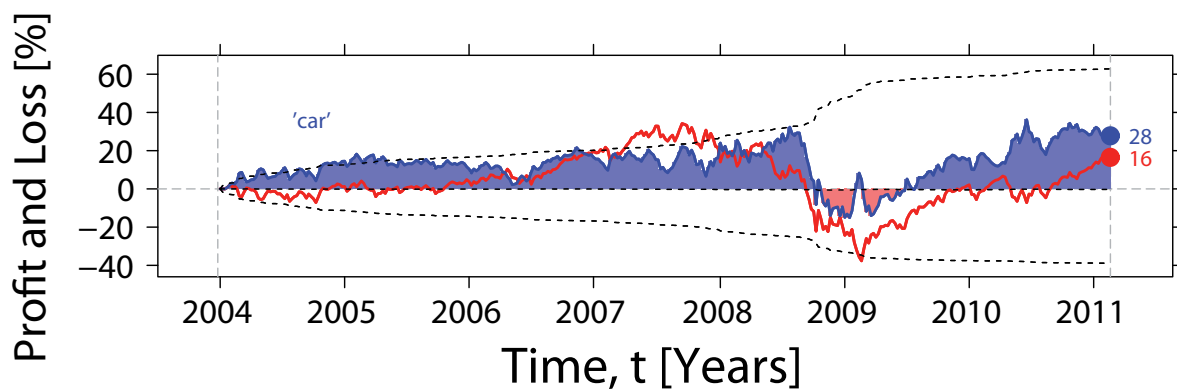

**Figure S9.** Profit and loss for an investment strategy based on the volume of the search term *car* with  $\Delta t = 3$  weeks.

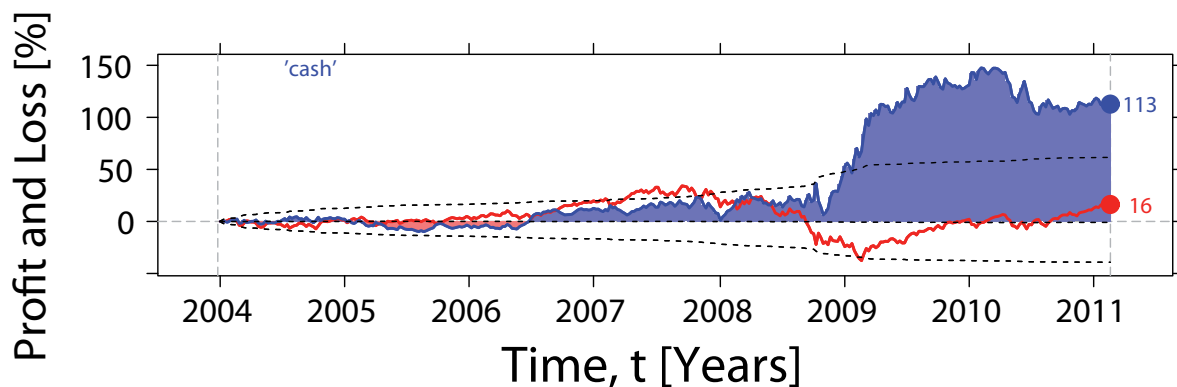

**Figure S10.** Profit and loss for an investment strategy based on the volume of the search term *cash* with  $\Delta t = 3$  weeks.

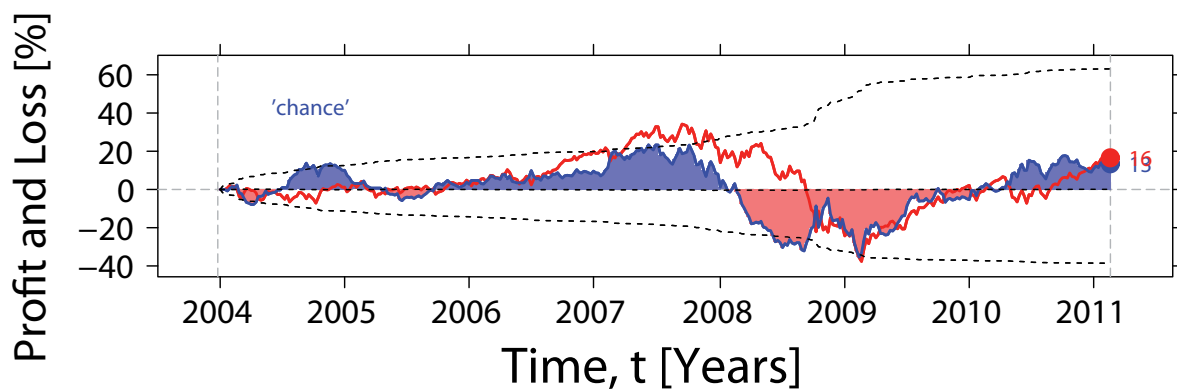

**Figure S11.** Profit and loss for an investment strategy based on the volume of the search term *chance* with  $\Delta t = 3$  weeks.

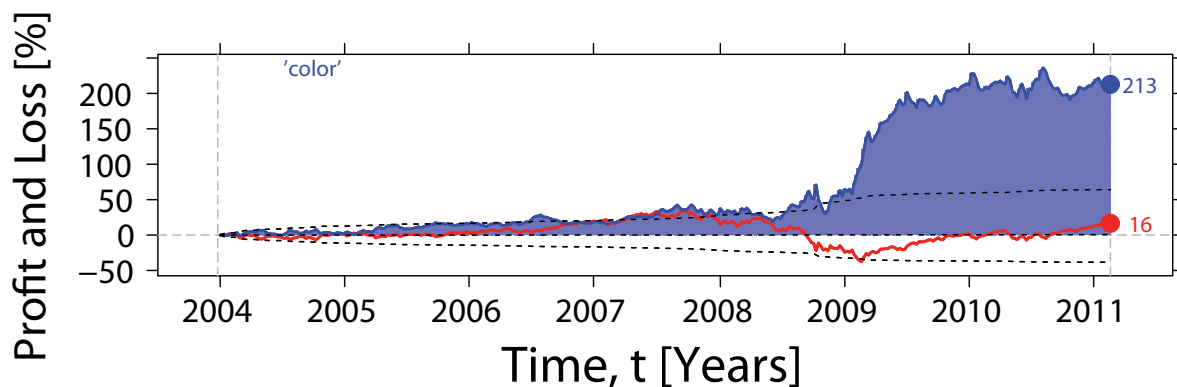

**Figure S12.** Profit and loss for an investment strategy based on the volume of the search term *color* with  $\Delta t = 3$  weeks.

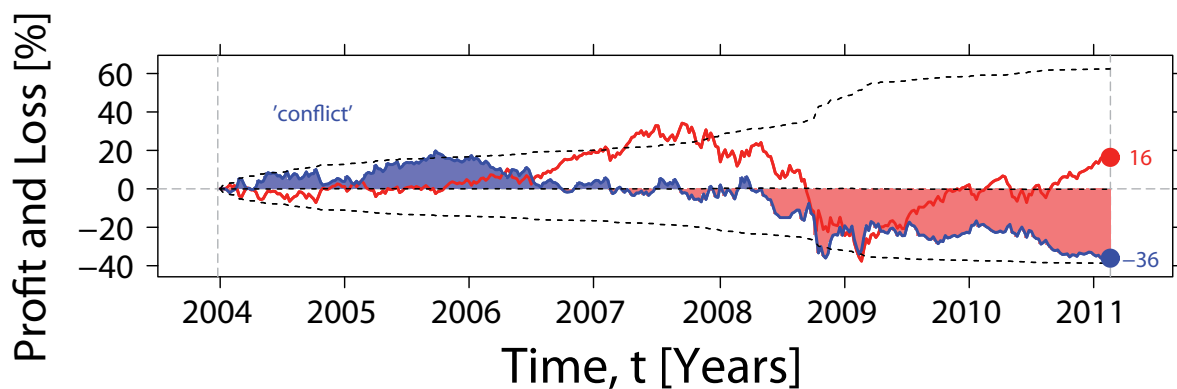

**Figure S13.** Profit and loss for an investment strategy based on the volume of the search term *conflict* with  $\Delta t = 3$  weeks.

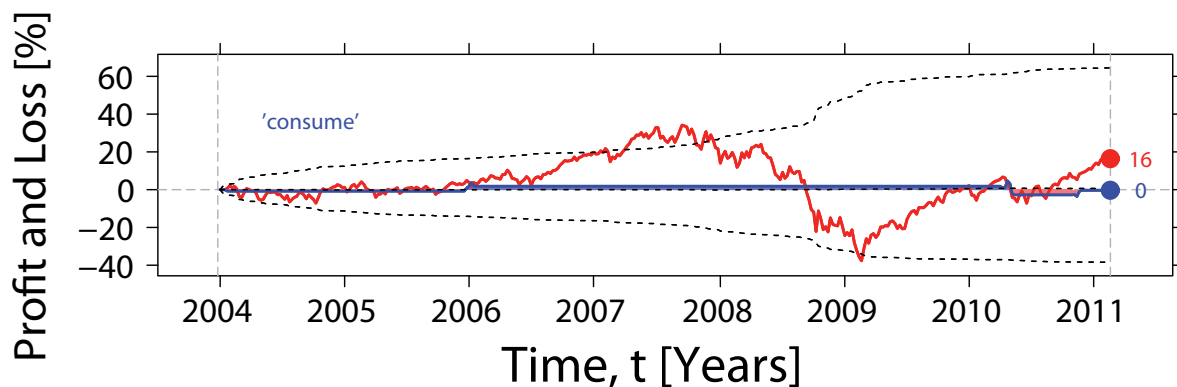

**Figure S14.** Profit and loss for an investment strategy based on the volume of the search term *consume* with  $\Delta t = 3$  weeks.

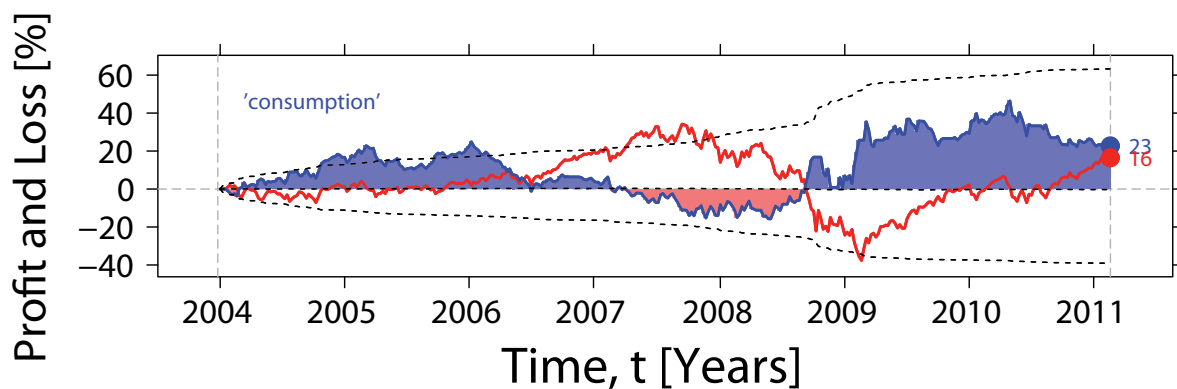

**Figure S15.** Profit and loss for an investment strategy based on the volume of the search term *consumption* with  $\Delta t = 3$  weeks.

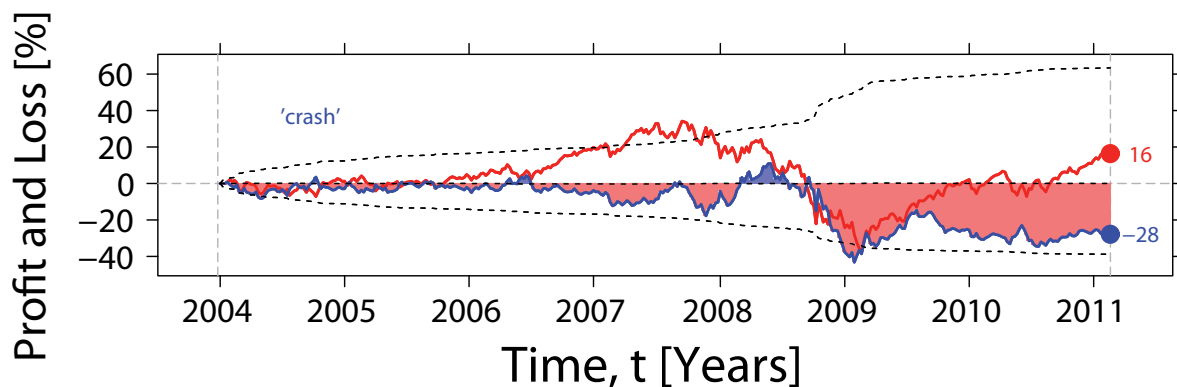

**Figure S16.** Profit and loss for an investment strategy based on the volume of the search term *crash* with  $\Delta t = 3$  weeks.

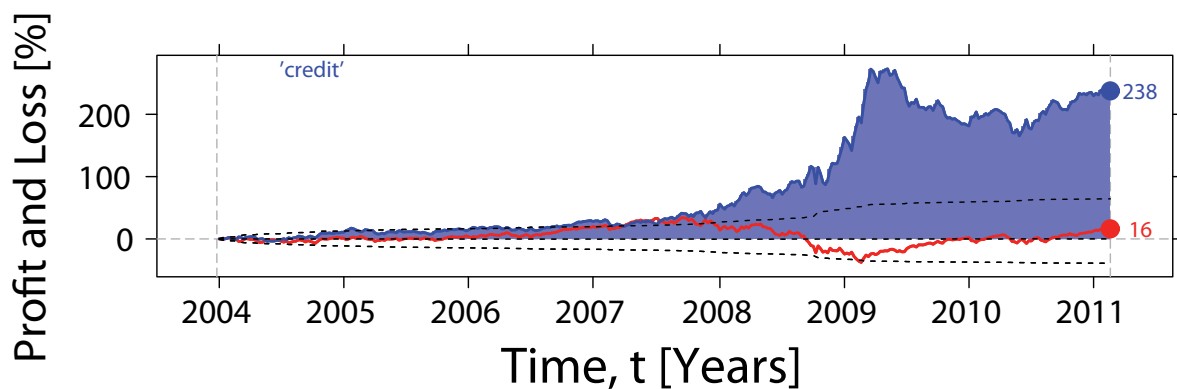

**Figure S17.** Profit and loss for an investment strategy based on the volume of the search term *credit* with  $\Delta t = 3$  weeks.

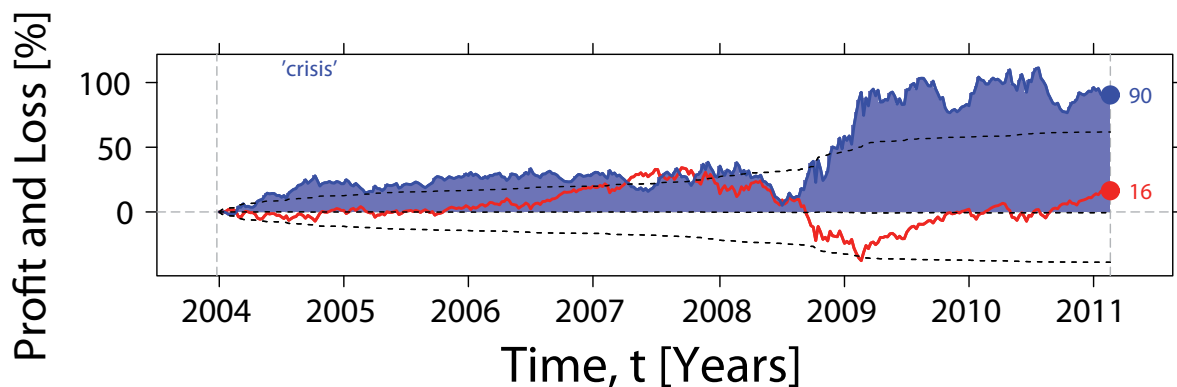

**Figure S18.** Profit and loss for an investment strategy based on the volume of the search term *crisis* with  $\Delta t = 3$  weeks.

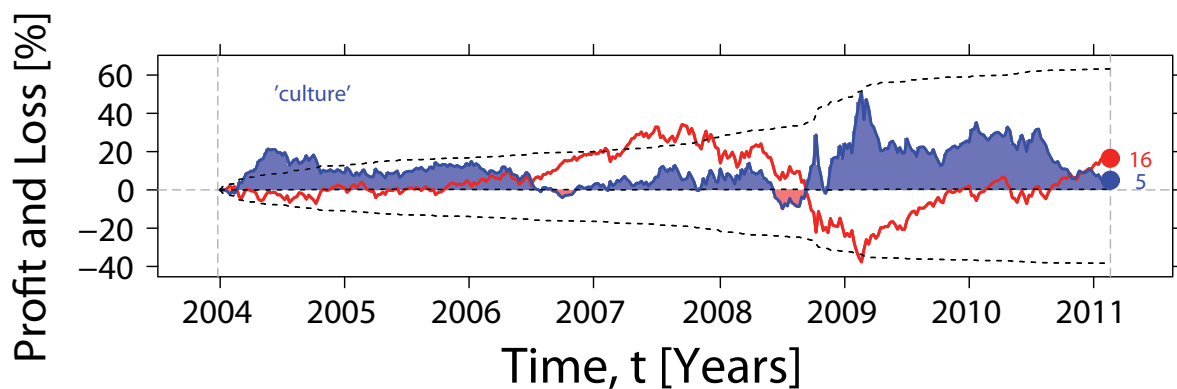

**Figure S19.** Profit and loss for an investment strategy based on the volume of the search term *culture* with  $\Delta t = 3$  weeks.

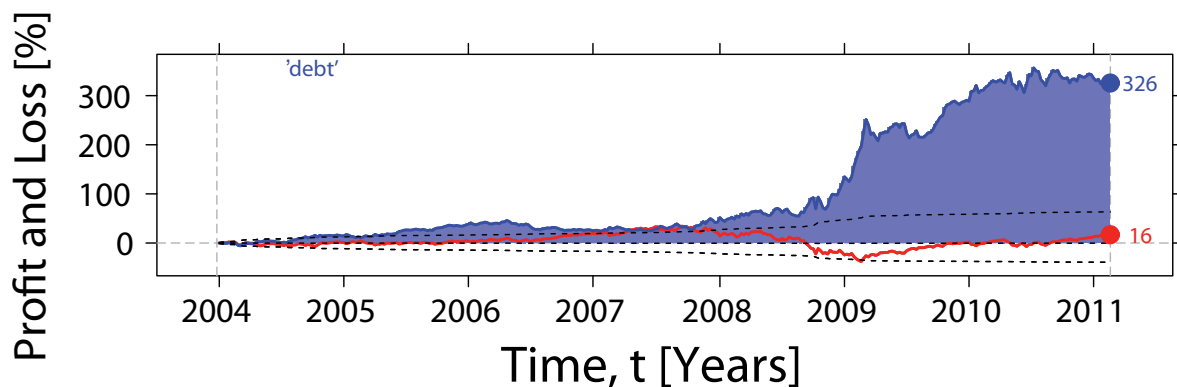

**Figure S20.** Profit and loss for an investment strategy based on the volume of the search term *debt* with  $\Delta t = 3$  weeks.

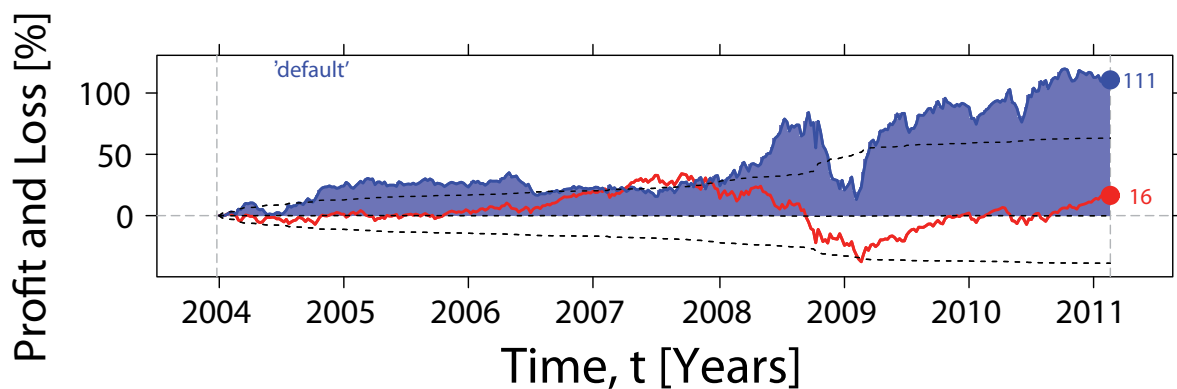

**Figure S21.** Profit and loss for an investment strategy based on the volume of the search term *default* with  $\Delta t = 3$  weeks.

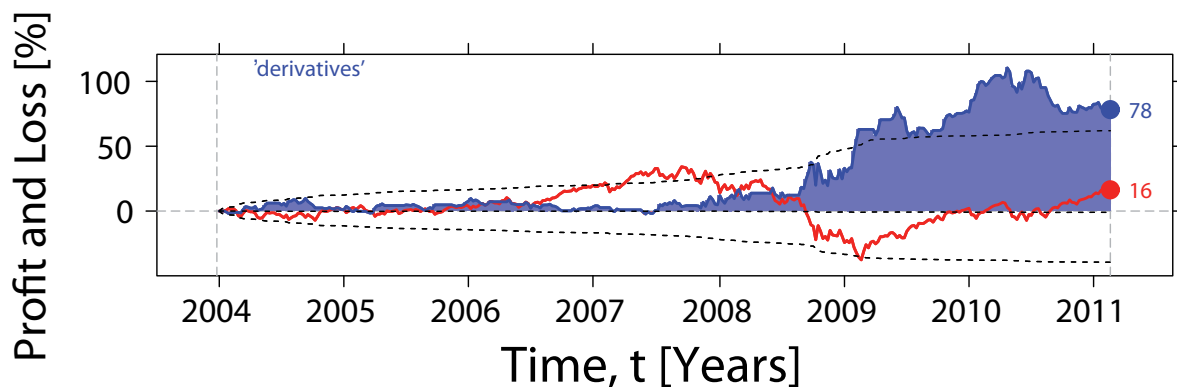

**Figure S22.** Profit and loss for an investment strategy based on the volume of the search term *derivatives* with  $\Delta t = 3$  weeks.

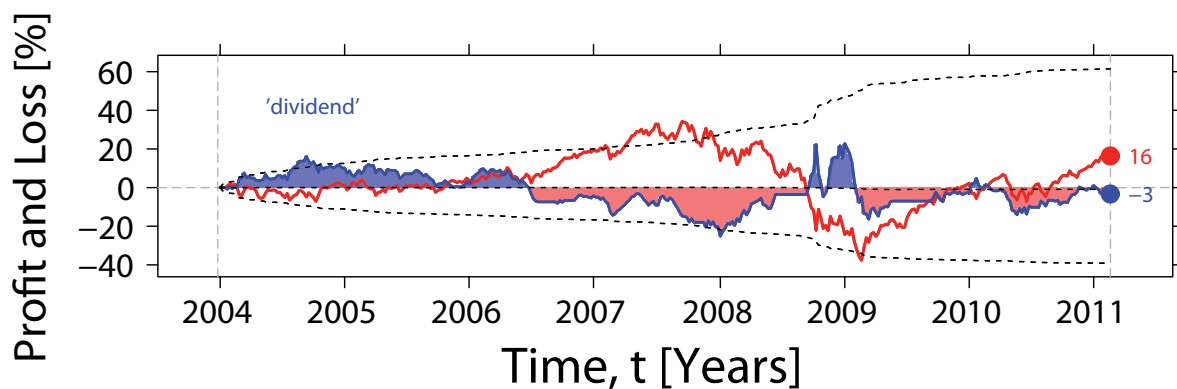

**Figure S23.** Profit and loss for an investment strategy based on the volume of the search term *dividend* with  $\Delta t = 3$  weeks.

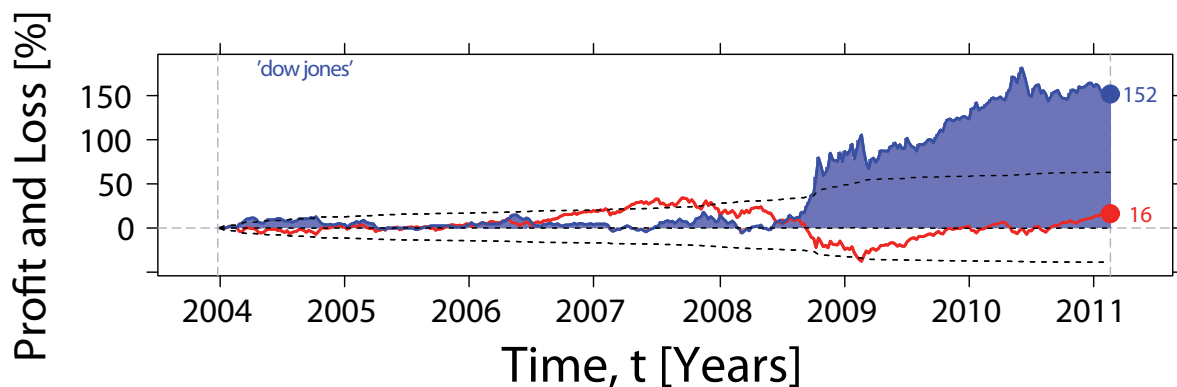

**Figure S24.** Profit and loss for an investment strategy based on the volume of the search term *dow jones* with  $\Delta t = 3$  weeks.

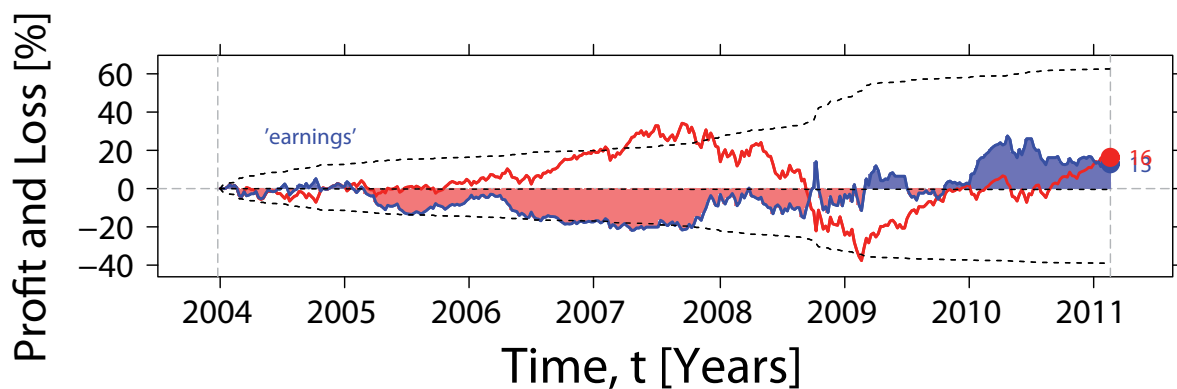

**Figure S25.** Profit and loss for an investment strategy based on the volume of the search term *earnings* with  $\Delta t = 3$  weeks.

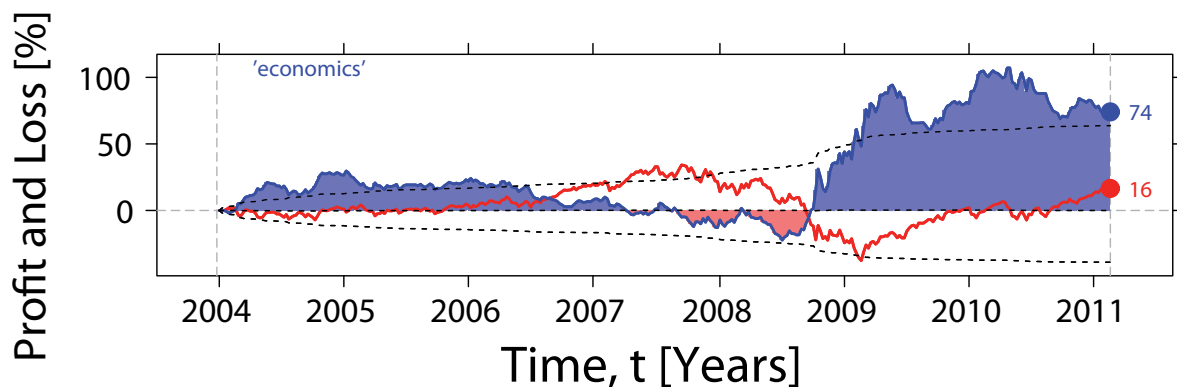

**Figure S26.** Profit and loss for an investment strategy based on the volume of the search term *economics* with  $\Delta t = 3$  weeks.

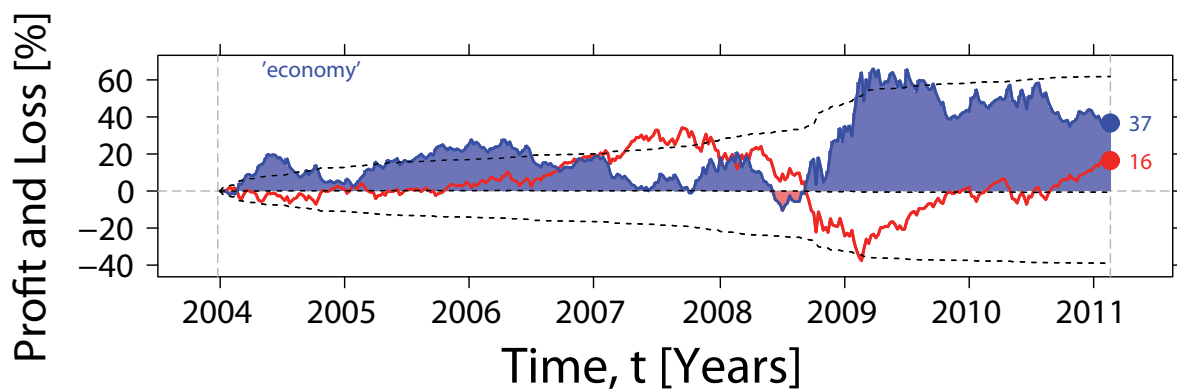

**Figure S27.** Profit and loss for an investment strategy based on the volume of the search term *economy* with  $\Delta t = 3$  weeks.

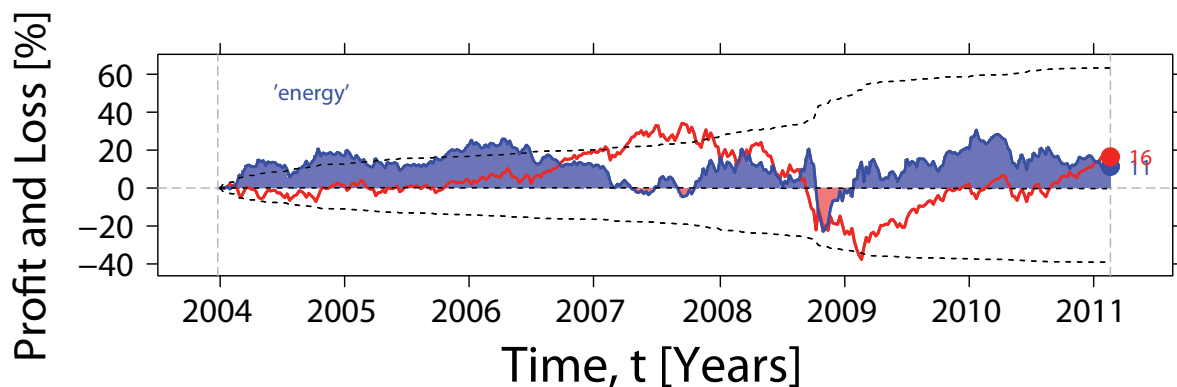

**Figure S28.** Profit and loss for an investment strategy based on the volume of the search term *energy* with  $\Delta t = 3$  weeks.

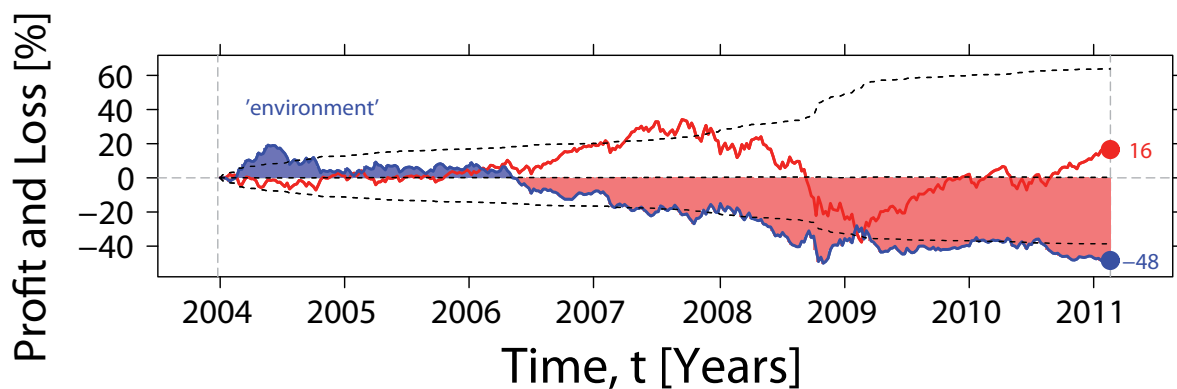

**Figure S29.** Profit and loss for an investment strategy based on the volume of the search term *environment* with  $\Delta t = 3$  weeks.

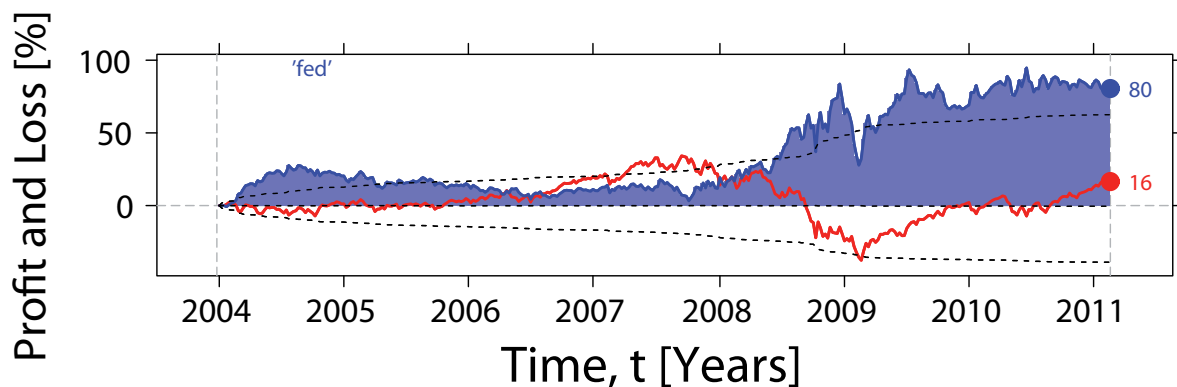

**Figure S30.** Profit and loss for an investment strategy based on the volume of the search term *fed* with  $\Delta t = 3$  weeks.

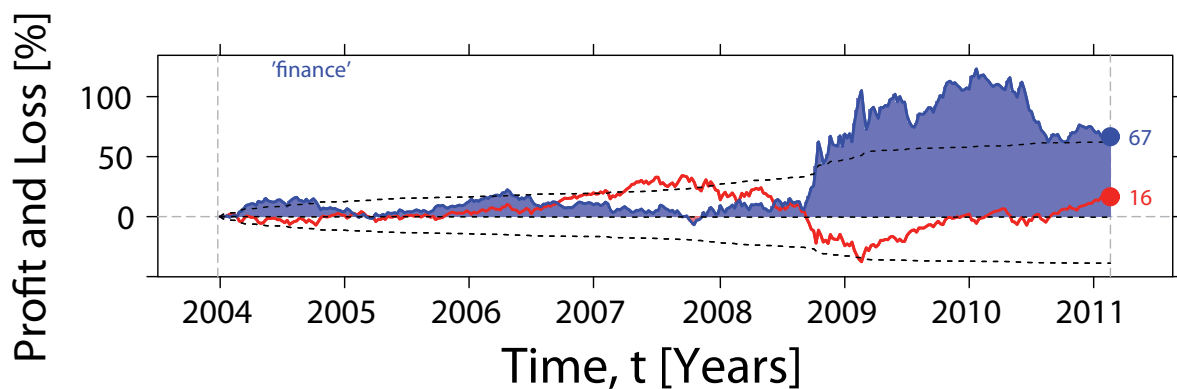

**Figure S31.** Profit and loss for an investment strategy based on the volume of the search term *finance* with  $\Delta t = 3$  weeks.

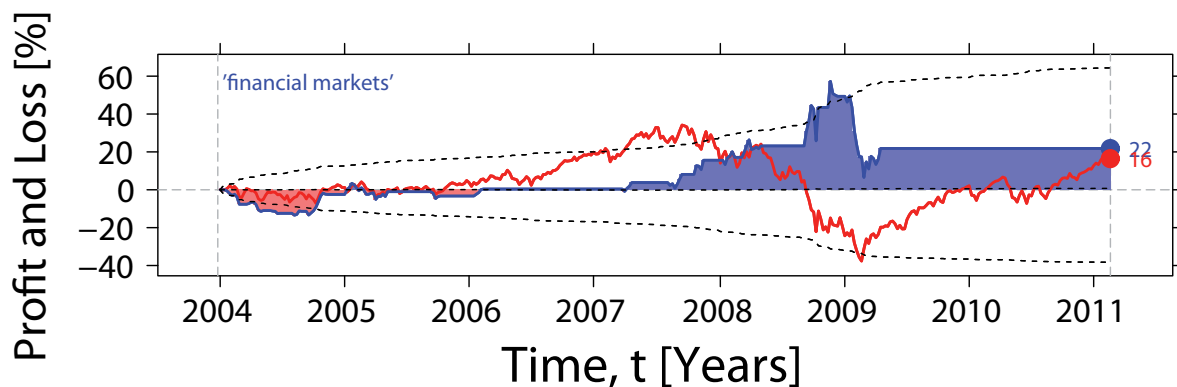

**Figure S32.** Profit and loss for an investment strategy based on the volume of the search term *financial markets* with  $\Delta t = 3$  weeks.

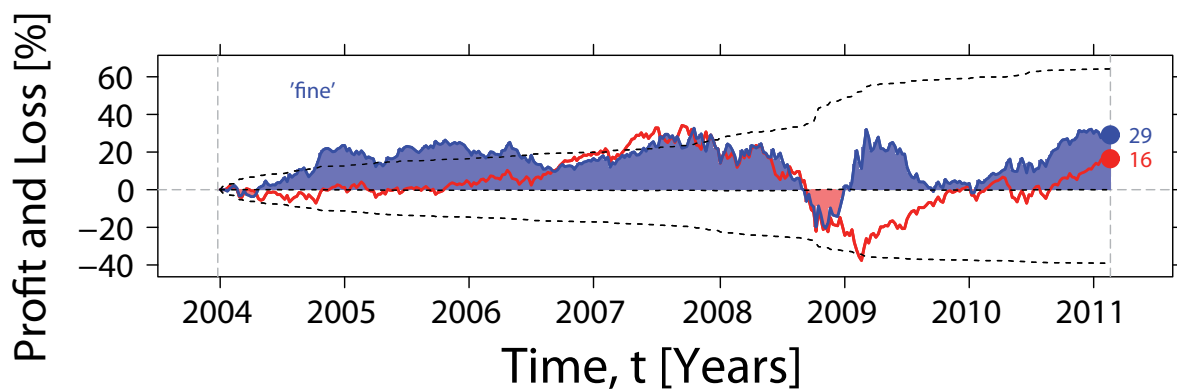

**Figure S33.** Profit and loss for an investment strategy based on the volume of the search term *fine* with  $\Delta t = 3$  weeks.

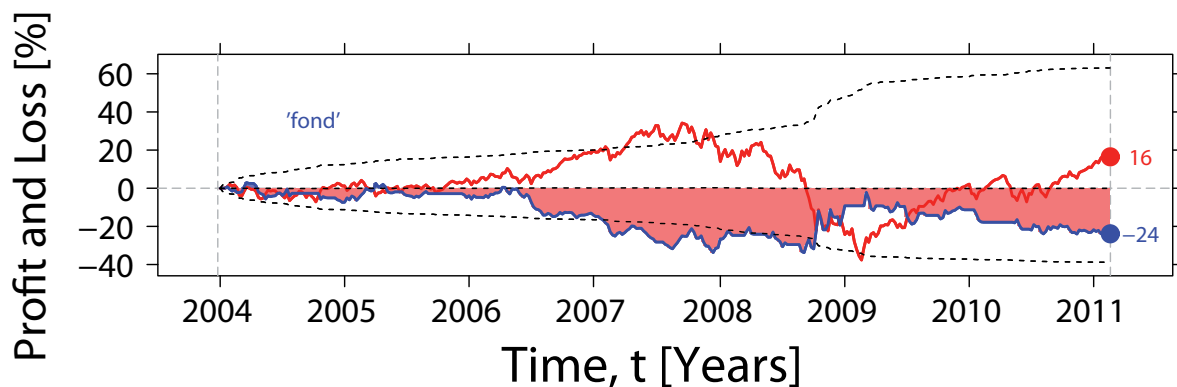

**Figure S34.** Profit and loss for an investment strategy based on the volume of the search term *fond* with  $\Delta t = 3$  weeks.

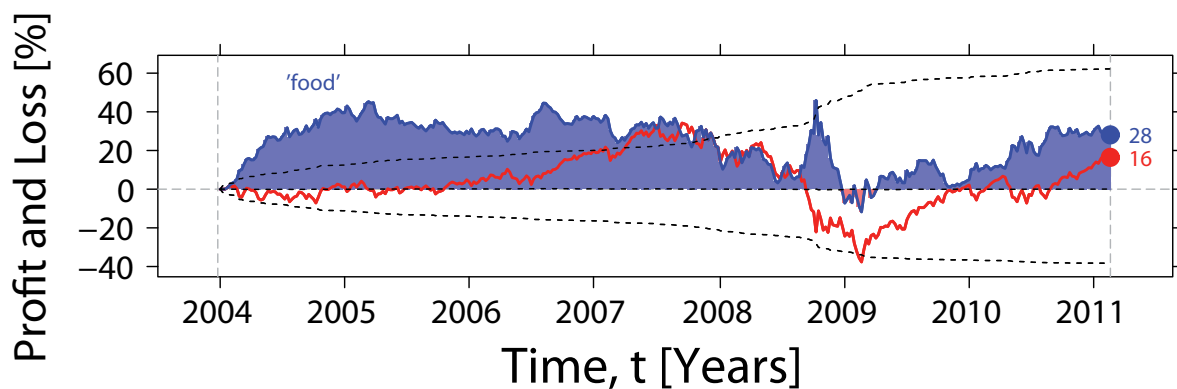

**Figure S35.** Profit and loss for an investment strategy based on the volume of the search term *food* with  $\Delta t = 3$  weeks.

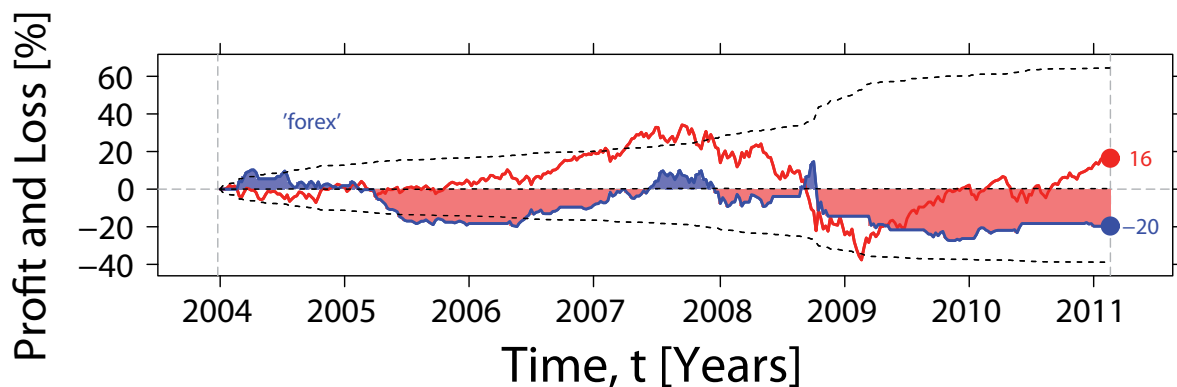

**Figure S36.** Profit and loss for an investment strategy based on the volume of the search term *forex* with  $\Delta t = 3$  weeks.

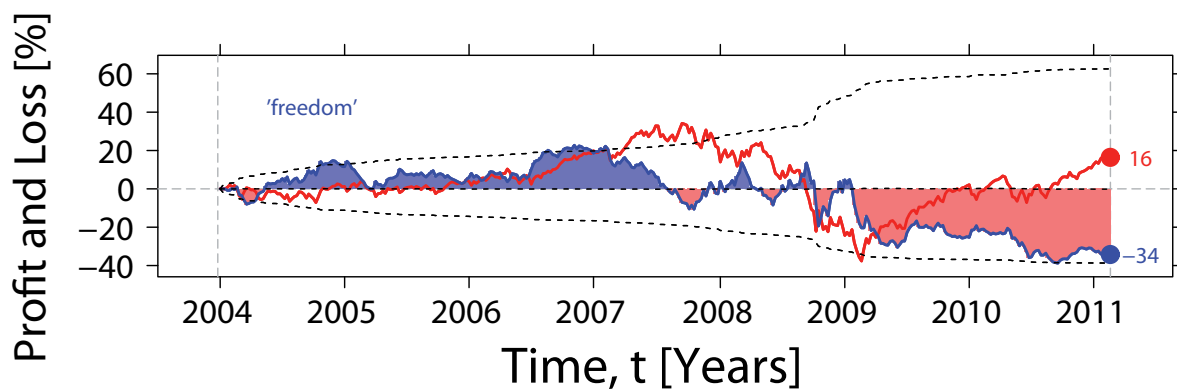

**Figure S37.** Profit and loss for an investment strategy based on the volume of the search term *freedom* with  $\Delta t = 3$  weeks.

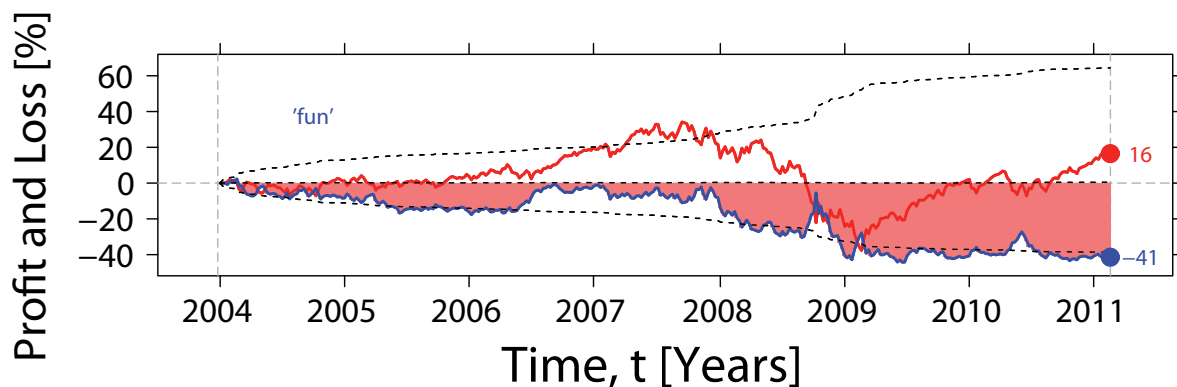

**Figure S38.** Profit and loss for an investment strategy based on the volume of the search term *fun* with  $\Delta t = 3$  weeks.

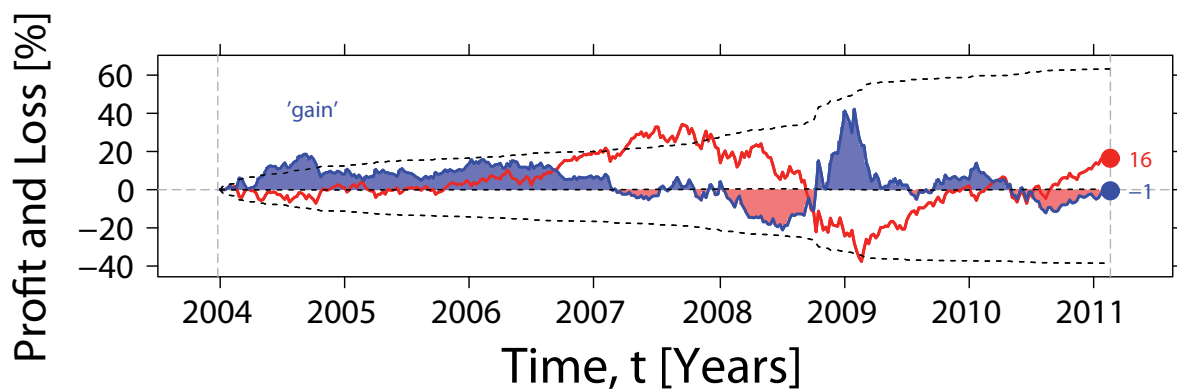

**Figure S39.** Profit and loss for an investment strategy based on the volume of the search term *gain* with  $\Delta t = 3$  weeks.

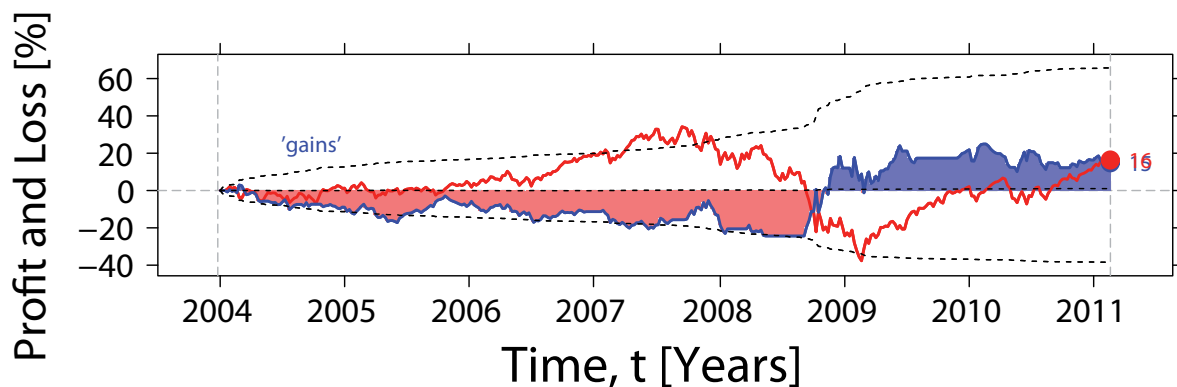

**Figure S40.** Profit and loss for an investment strategy based on the volume of the search term *gains* with  $\Delta t = 3$  weeks.

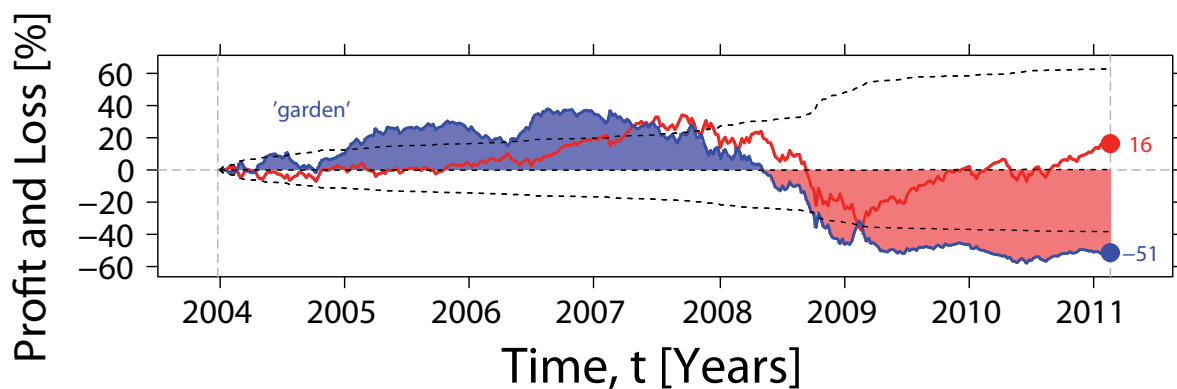

**Figure S41.** Profit and loss for an investment strategy based on the volume of the search term *garden* with  $\Delta t = 3$  weeks.

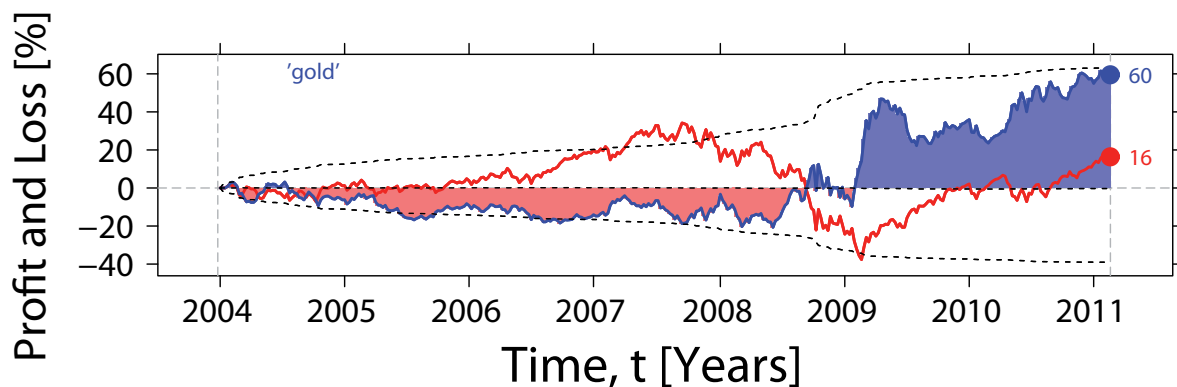

**Figure S42.** Profit and loss for an investment strategy based on the volume of the search term *gold* with  $\Delta t = 3$  weeks.

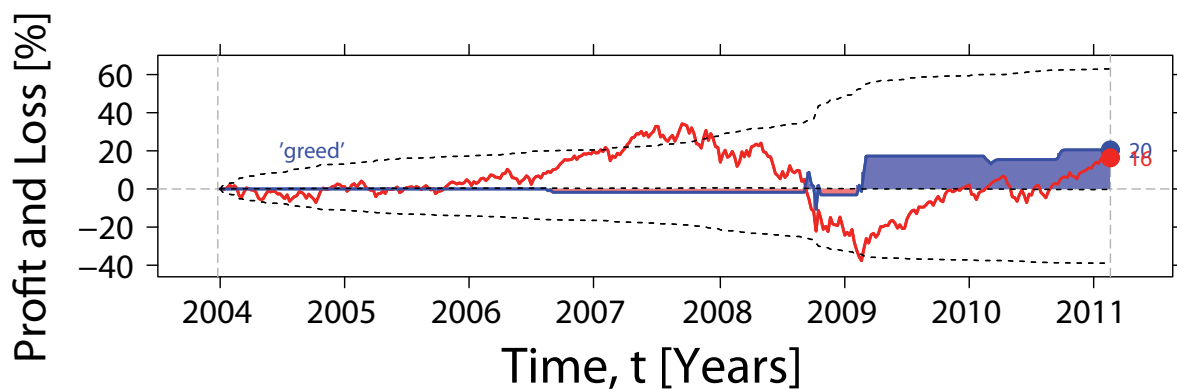

**Figure S43.** Profit and loss for an investment strategy based on the volume of the search term *greed* with  $\Delta t = 3$  weeks.

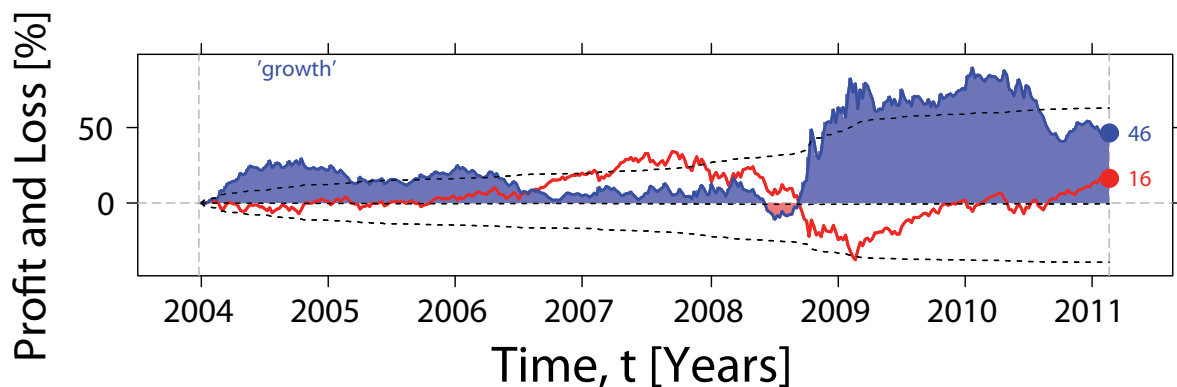

**Figure S44.** Profit and loss for an investment strategy based on the volume of the search term *growth* with  $\Delta t = 3$  weeks.

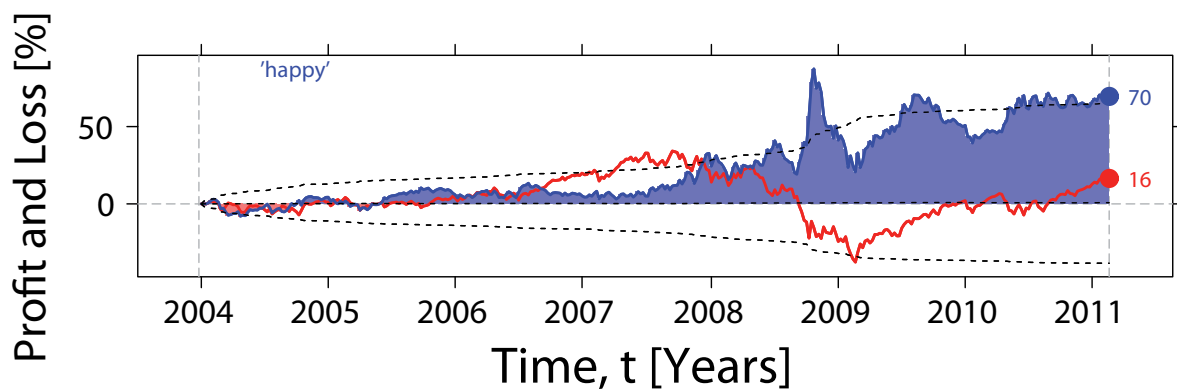

**Figure S45.** Profit and loss for an investment strategy based on the volume of the search term *happy* with  $\Delta t = 3$  weeks.

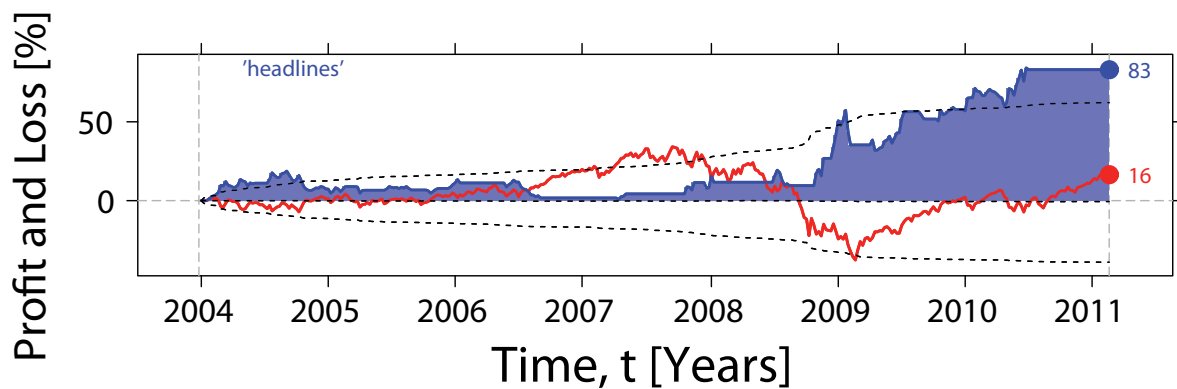

**Figure S46.** Profit and loss for an investment strategy based on the volume of the search term *headlines* with  $\Delta t = 3$  weeks.

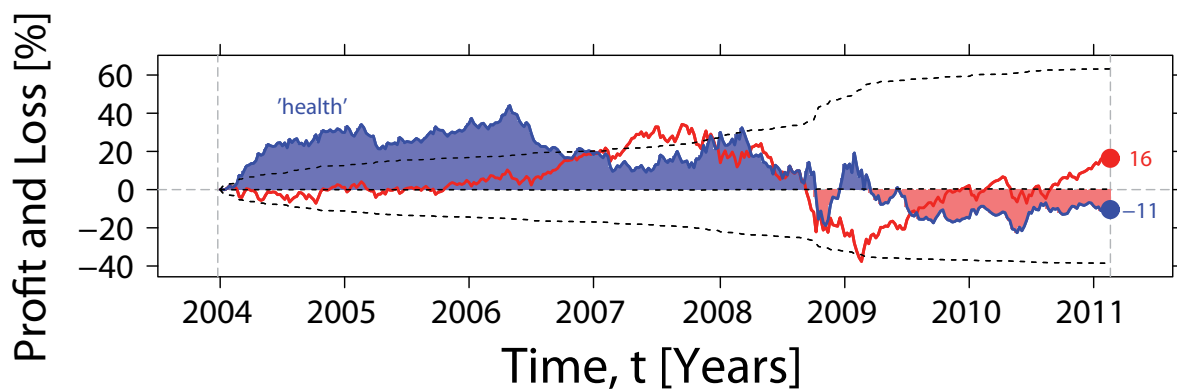

**Figure S47.** Profit and loss for an investment strategy based on the volume of the search term *health* with  $\Delta t = 3$  weeks.

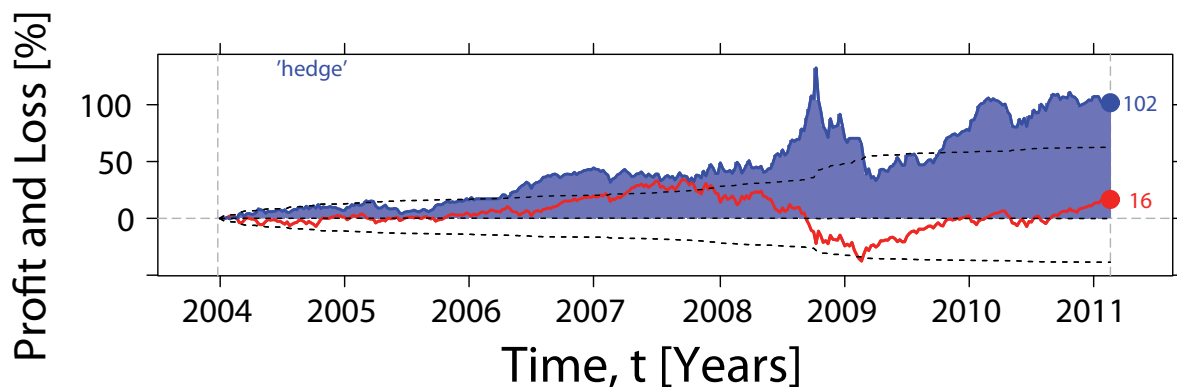

**Figure S48.** Profit and loss for an investment strategy based on the volume of the search term *hedge* with  $\Delta t = 3$  weeks.

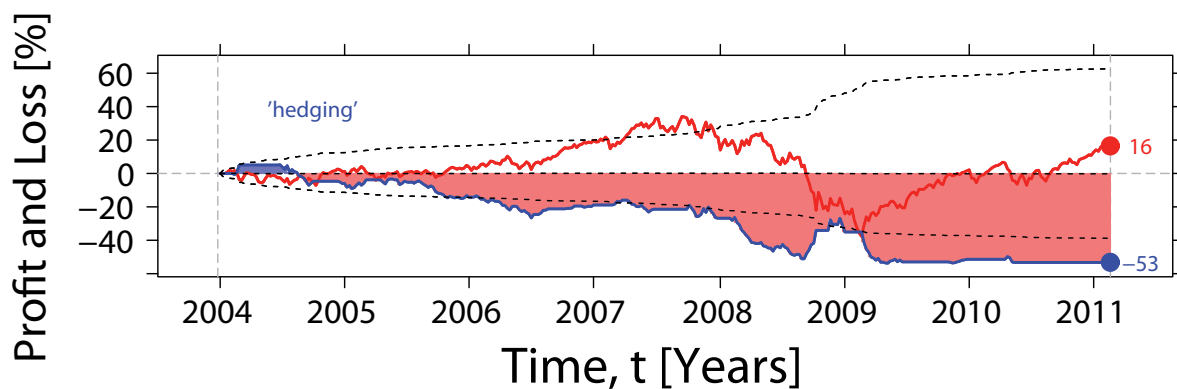

**Figure S49.** Profit and loss for an investment strategy based on the volume of the search term *hedging* with  $\Delta t = 3$  weeks.

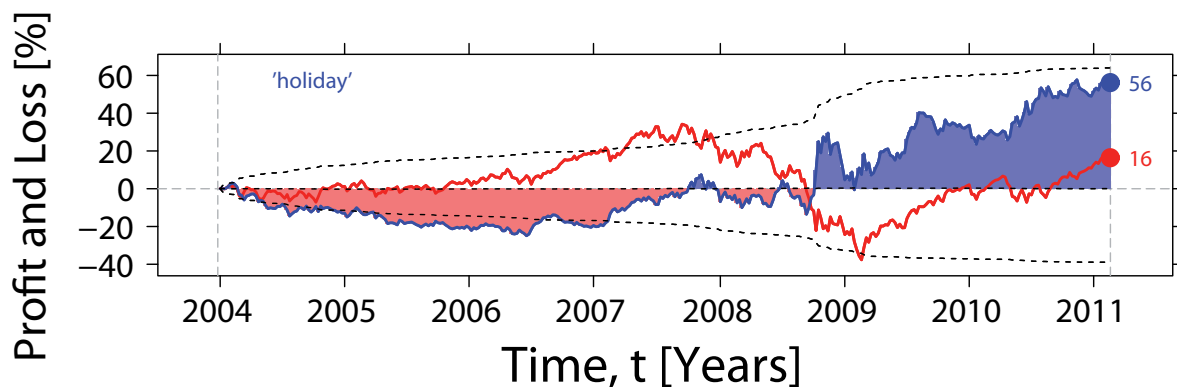

**Figure S50.** Profit and loss for an investment strategy based on the volume of the search term *holiday* with  $\Delta t = 3$  weeks.

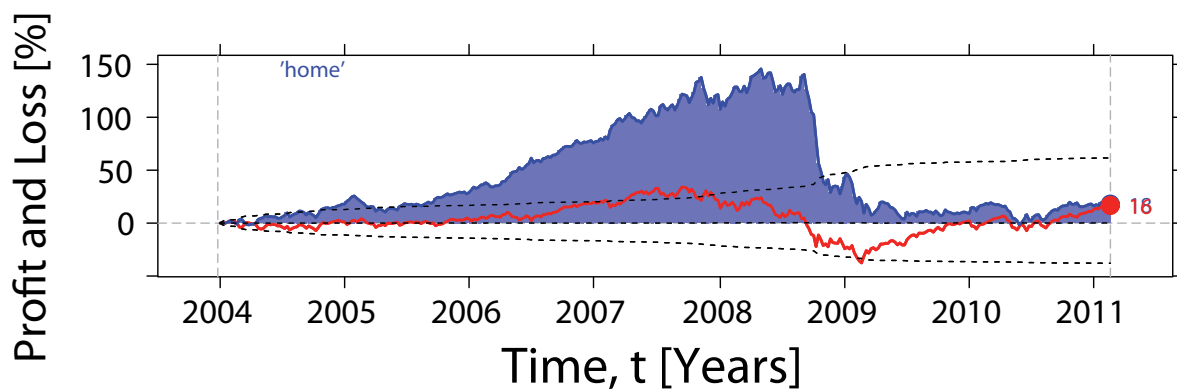

**Figure S51.** Profit and loss for an investment strategy based on the volume of the search term *home* with  $\Delta t = 3$  weeks.

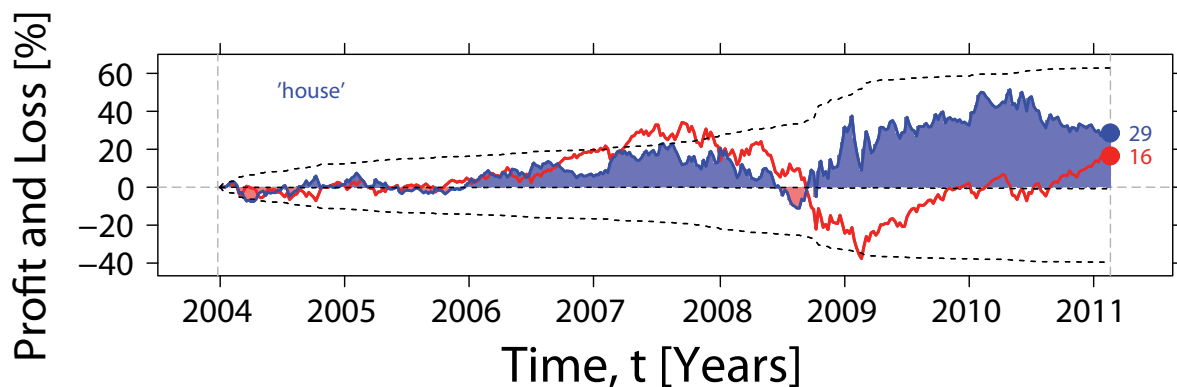

**Figure S52.** Profit and loss for an investment strategy based on the volume of the search term *house* with  $\Delta t = 3$  weeks.

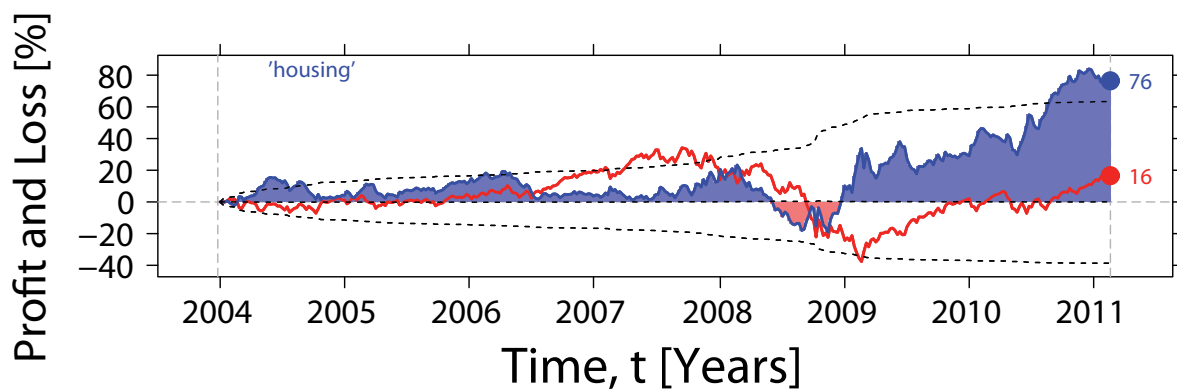

**Figure S53.** Profit and loss for an investment strategy based on the volume of the search term *housing* with  $\Delta t = 3$  weeks.

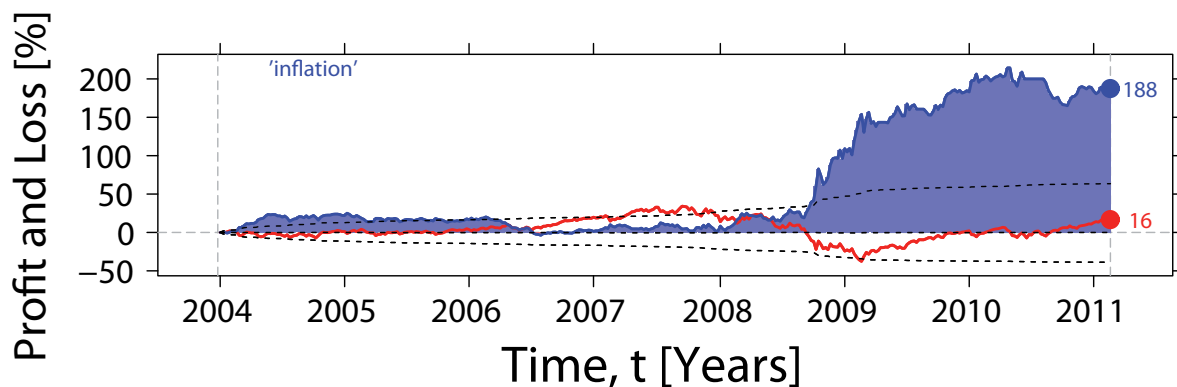

**Figure S54.** Profit and loss for an investment strategy based on the volume of the search term *inflation* with  $\Delta t = 3$  weeks.

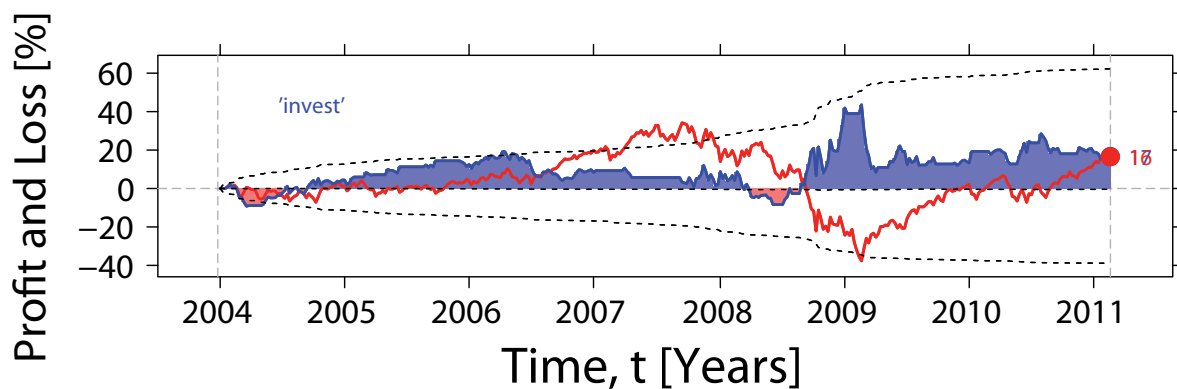

**Figure S55.** Profit and loss for an investment strategy based on the volume of the search term *invest* with  $\Delta t = 3$  weeks.

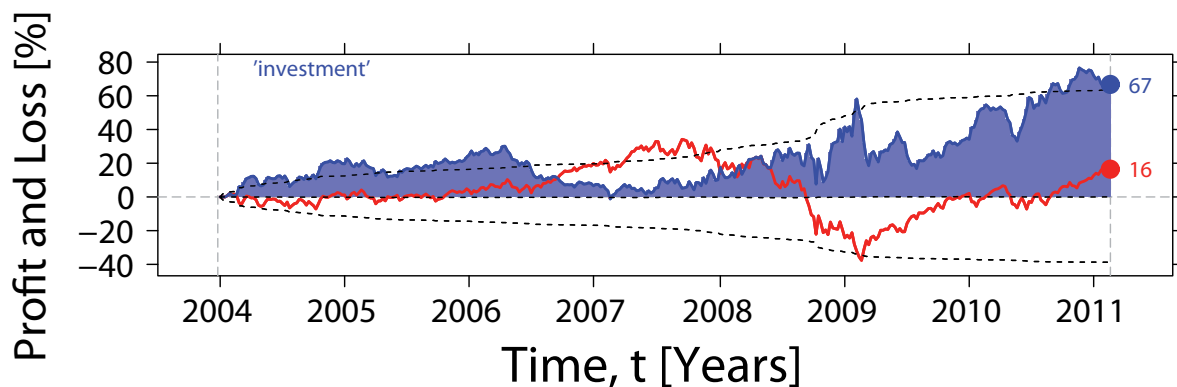

**Figure S56.** Profit and loss for an investment strategy based on the volume of the search term *investment* with  $\Delta t = 3$  weeks.

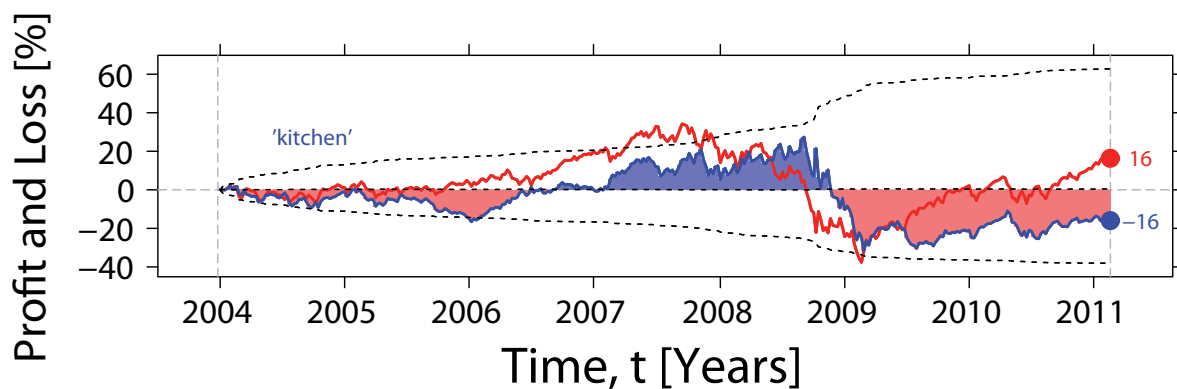

**Figure S57.** Profit and loss for an investment strategy based on the volume of the search term *kitchen* with  $\Delta t = 3$  weeks.

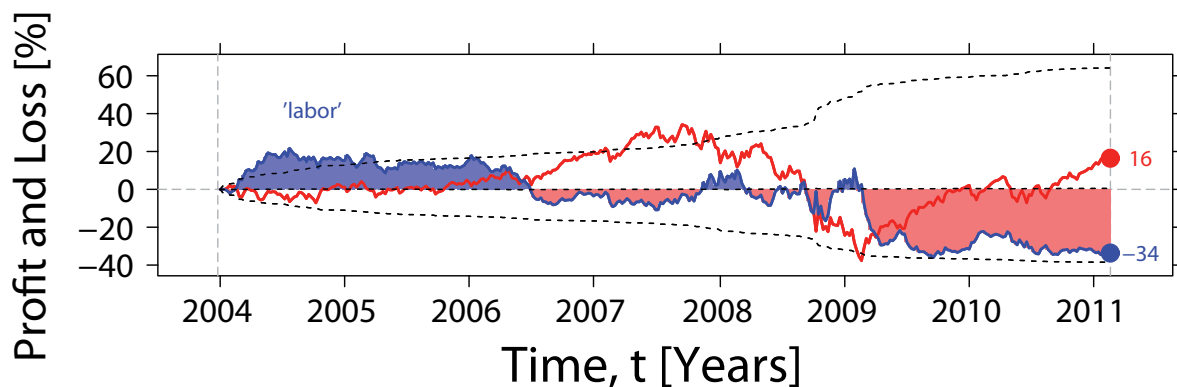

**Figure S58.** Profit and loss for an investment strategy based on the volume of the search term *labor* with  $\Delta t = 3$  weeks.

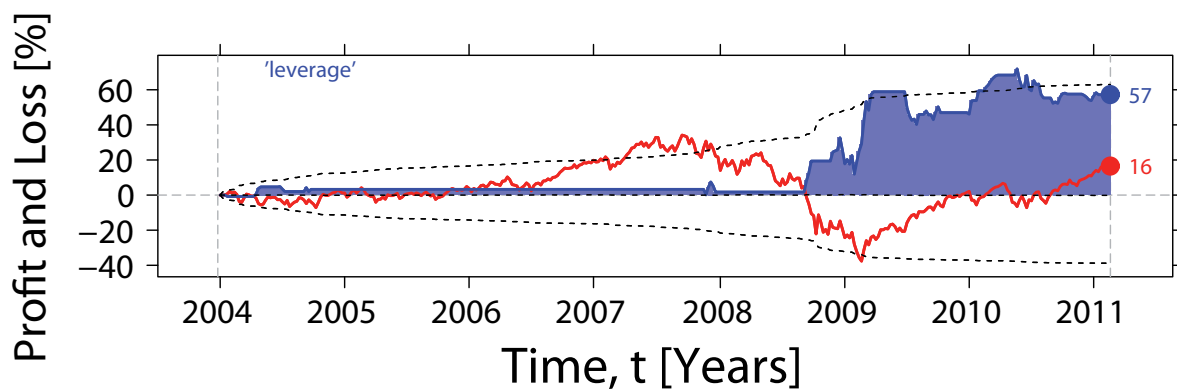

**Figure S59.** Profit and loss for an investment strategy based on the volume of the search term *leverage* with  $\Delta t = 3$  weeks.

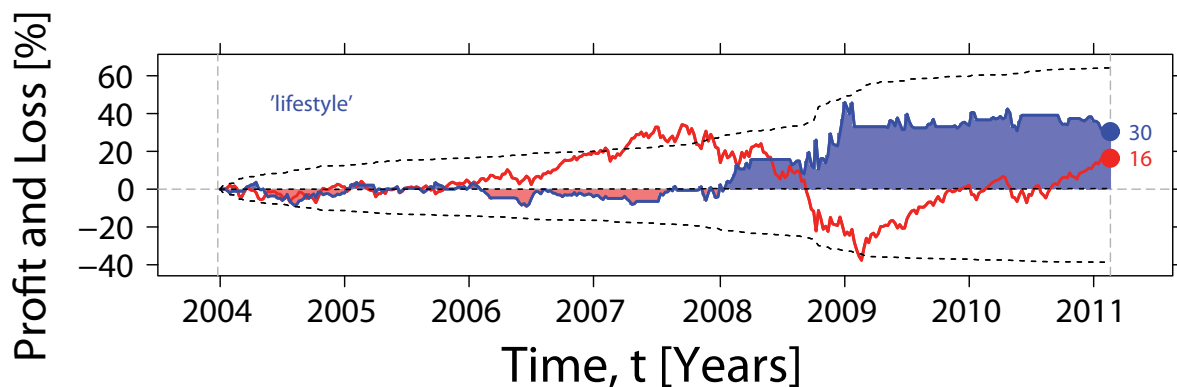

**Figure S60.** Profit and loss for an investment strategy based on the volume of the search term *lifestyle* with  $\Delta t = 3$  weeks.

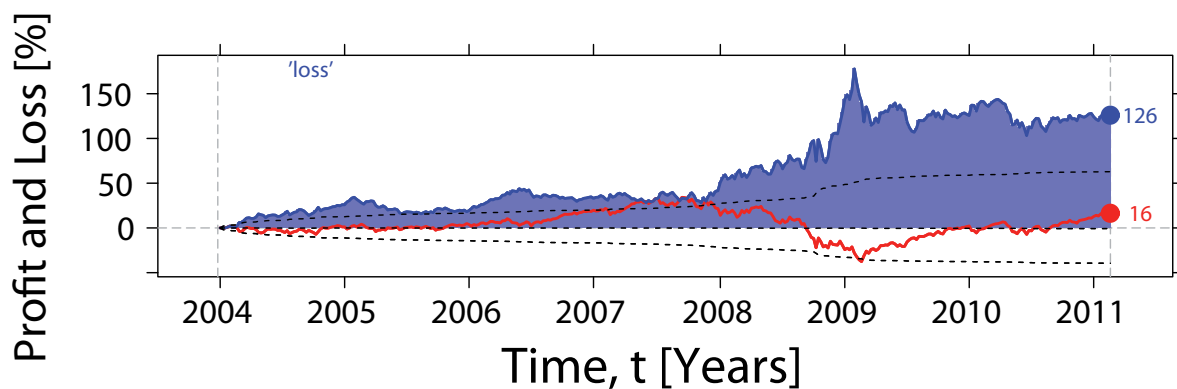

**Figure S61.** Profit and loss for an investment strategy based on the volume of the search term *loss* with  $\Delta t = 3$  weeks.

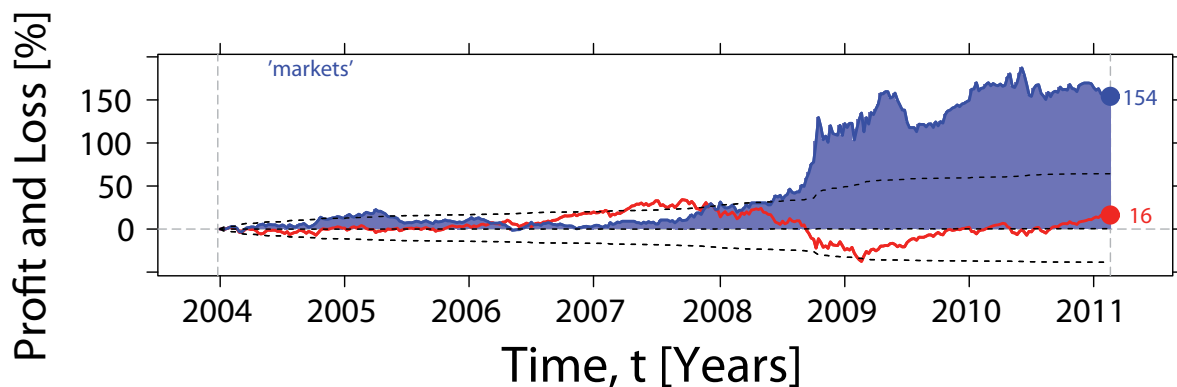

**Figure S62.** Profit and loss for an investment strategy based on the volume of the search term *markets* with  $\Delta t = 3$  weeks.

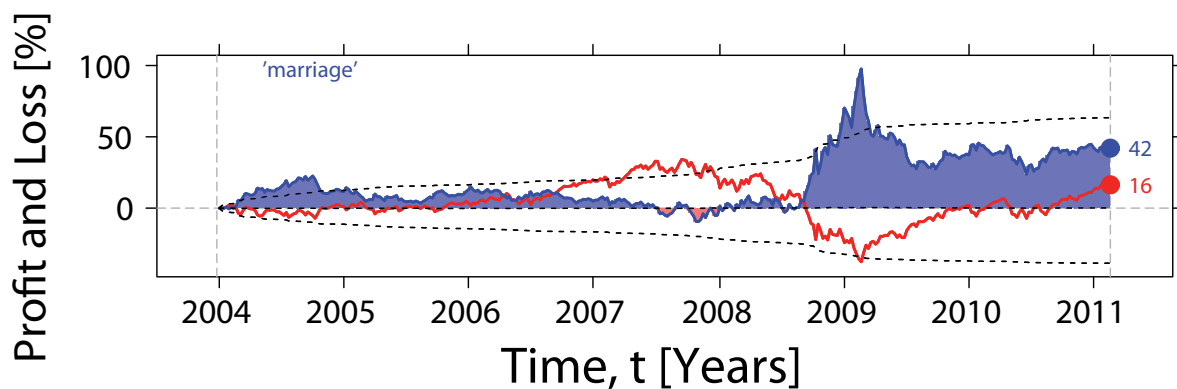

**Figure S63.** Profit and loss for an investment strategy based on the volume of the search term *marriage* with  $\Delta t = 3$  weeks.

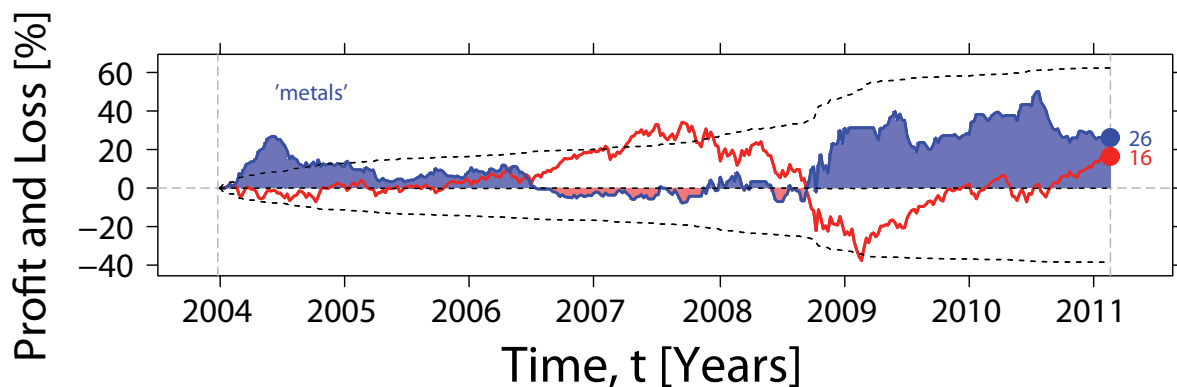

**Figure S64.** Profit and loss for an investment strategy based on the volume of the search term *metals* with  $\Delta t = 3$  weeks.

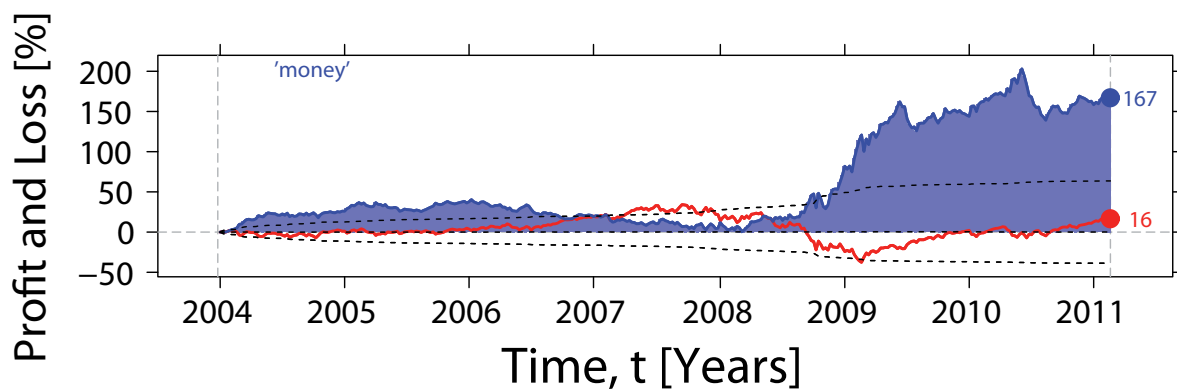

**Figure S65.** Profit and loss for an investment strategy based on the volume of the search term *money* with  $\Delta t = 3$  weeks.

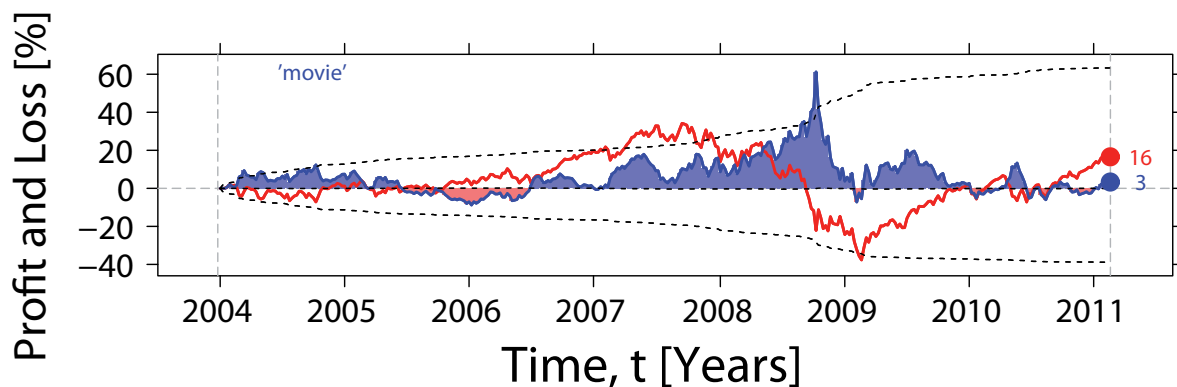

**Figure S66.** Profit and loss for an investment strategy based on the volume of the search term *movie* with  $\Delta t = 3$  weeks.

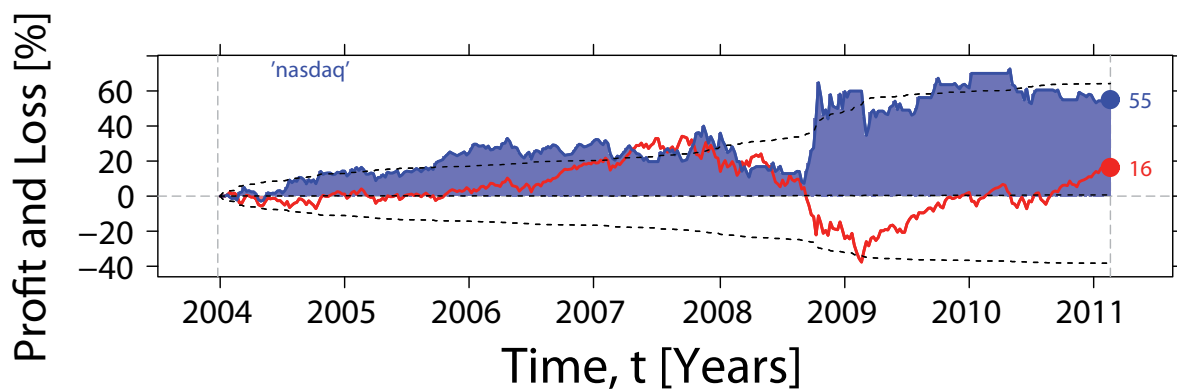

**Figure S67.** Profit and loss for an investment strategy based on the volume of the search term *nasdaq* with  $\Delta t = 3$  weeks.

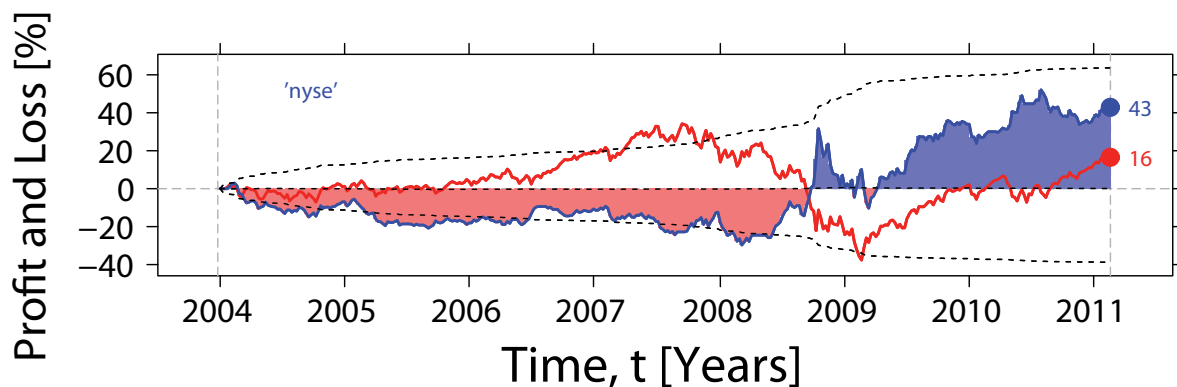

**Figure S68.** Profit and loss for an investment strategy based on the volume of the search term *nyse* with  $\Delta t = 3$  weeks.

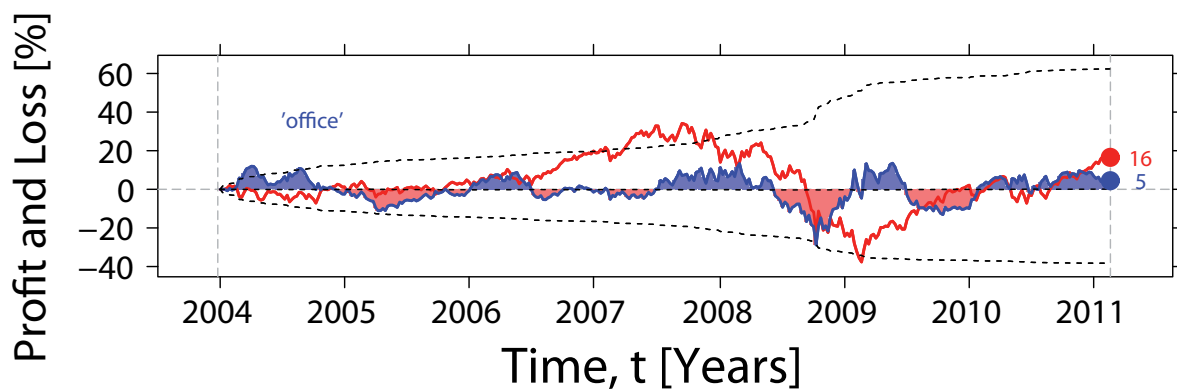

**Figure S69.** Profit and loss for an investment strategy based on the volume of the search term *office* with  $\Delta t = 3$  weeks.

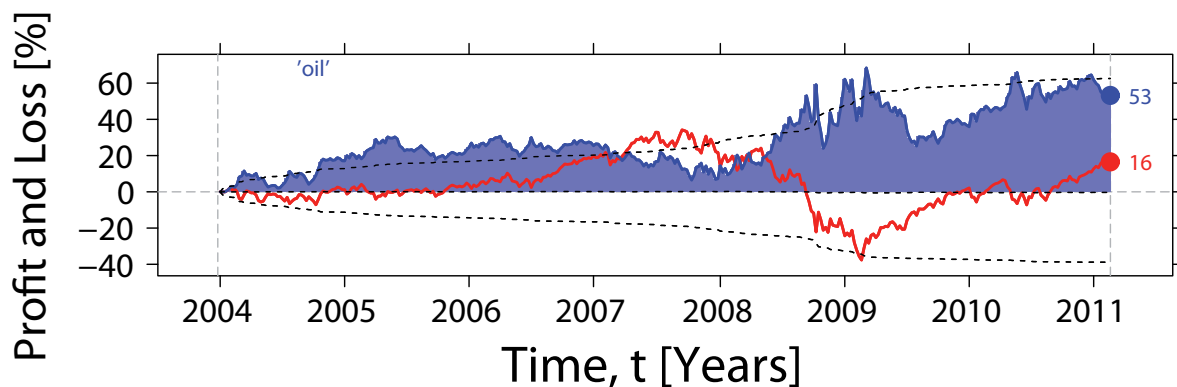

**Figure S70.** Profit and loss for an investment strategy based on the volume of the search term *oil* with  $\Delta t = 3$  weeks.

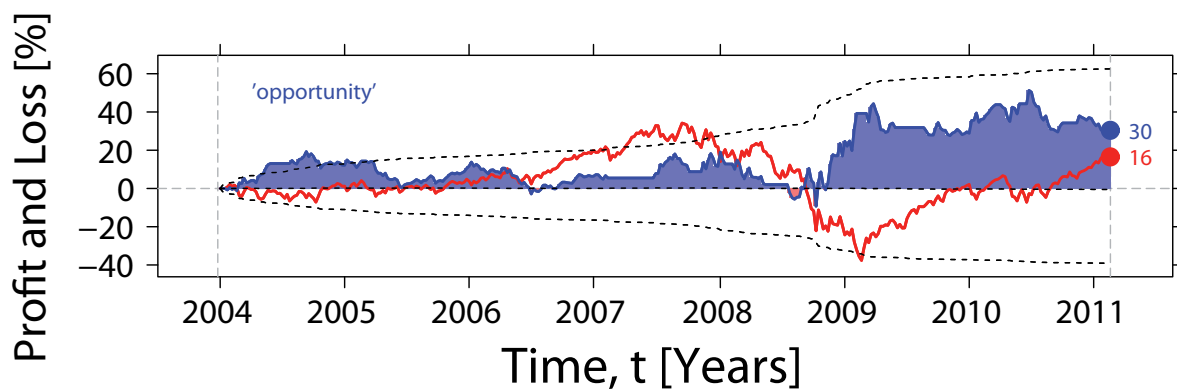

**Figure S71.** Profit and loss for an investment strategy based on the volume of the search term *opportunity* with  $\Delta t = 3$  weeks.

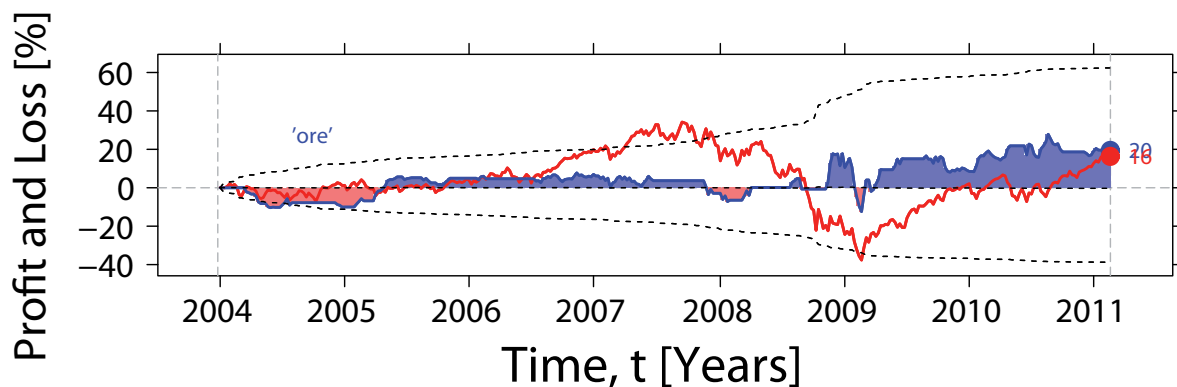

**Figure S72.** Profit and loss for an investment strategy based on the volume of the search term *ore* with  $\Delta t = 3$  weeks.

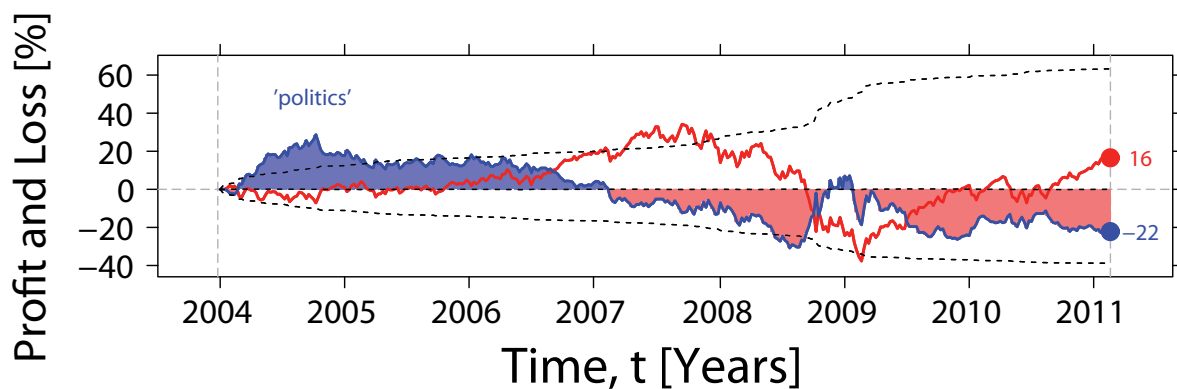

**Figure S73.** Profit and loss for an investment strategy based on the volume of the search term *politics* with  $\Delta t = 3$  weeks.

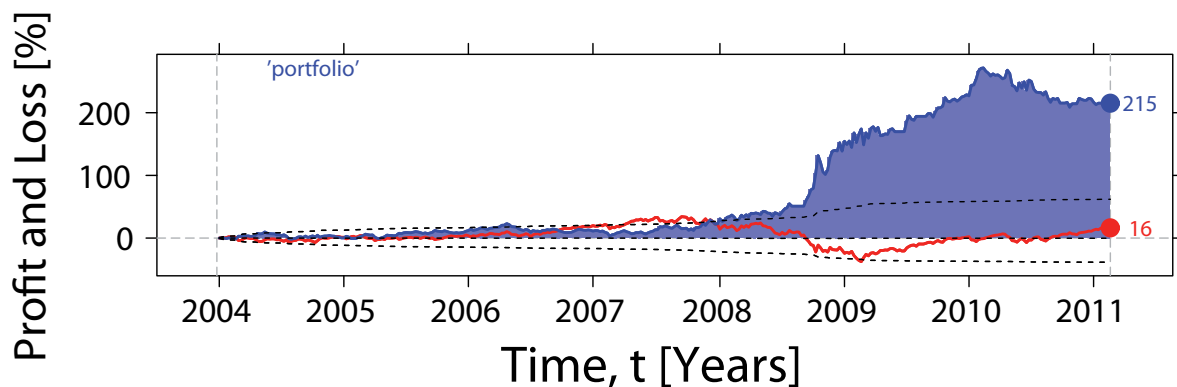

**Figure S74.** Profit and loss for an investment strategy based on the volume of the search term *portfolio* with  $\Delta t = 3$  weeks.

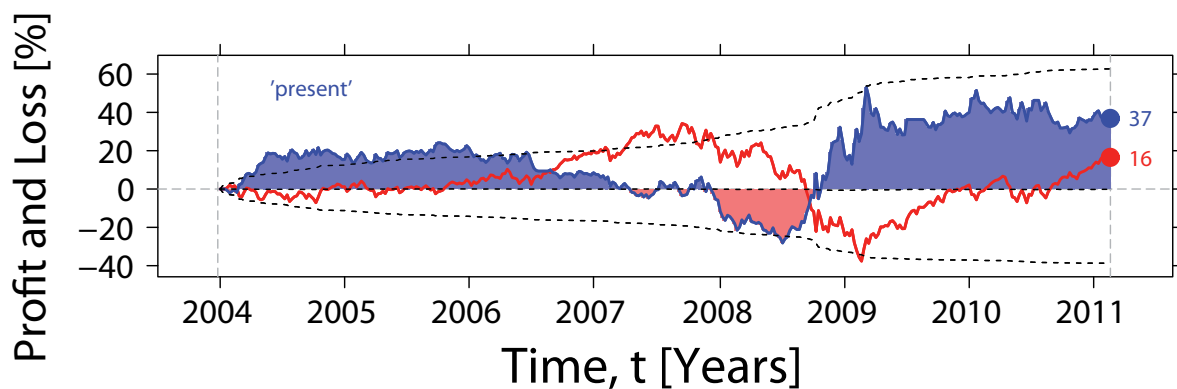

**Figure S75.** Profit and loss for an investment strategy based on the volume of the search term *present* with  $\Delta t = 3$  weeks.

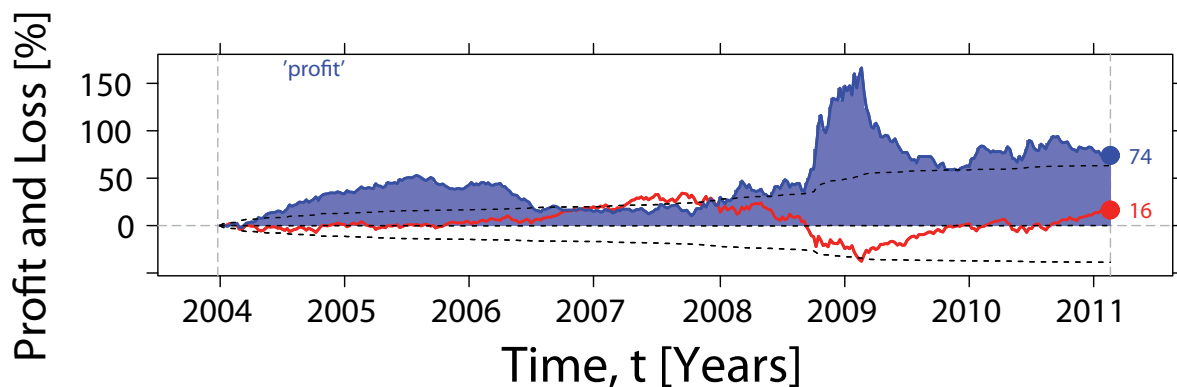

**Figure S76.** Profit and loss for an investment strategy based on the volume of the search term *profit* with  $\Delta t = 3$  weeks.

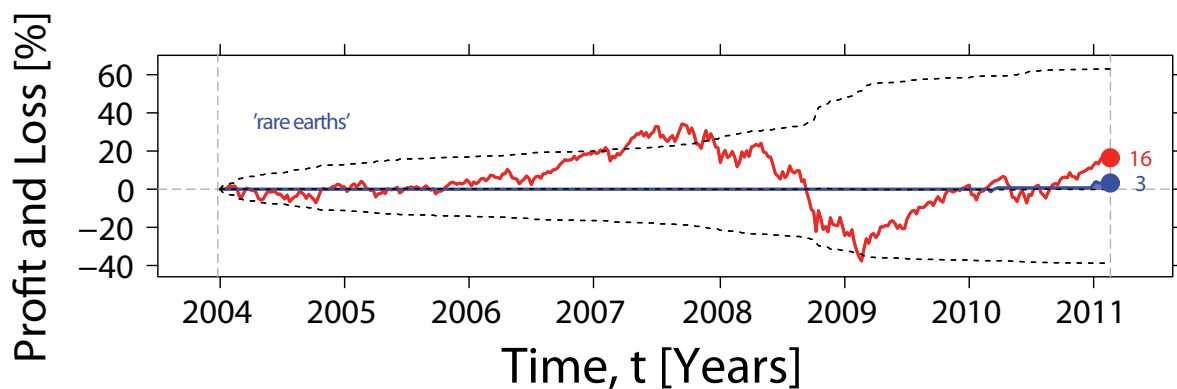

**Figure S77.** Profit and loss for an investment strategy based on the volume of the search term *rare earths* with  $\Delta t = 3$  weeks.

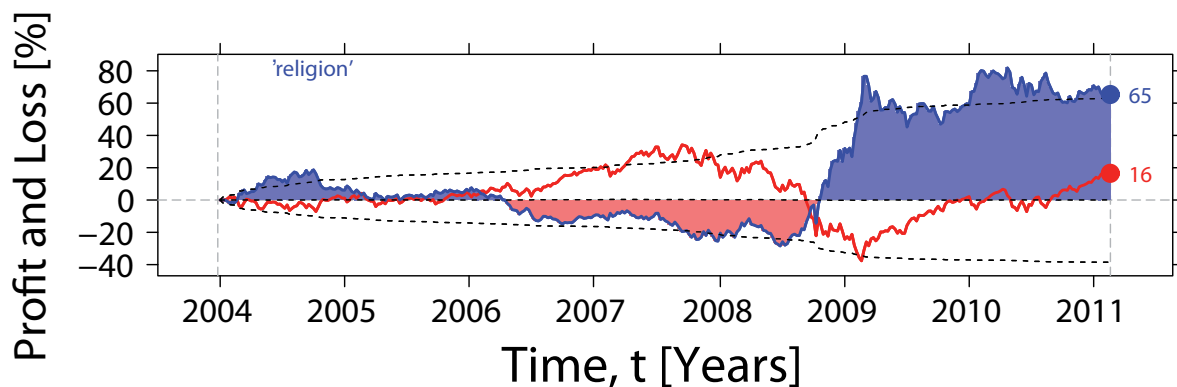

**Figure S78.** Profit and loss for an investment strategy based on the volume of the search term *religion* with  $\Delta t = 3$  weeks.

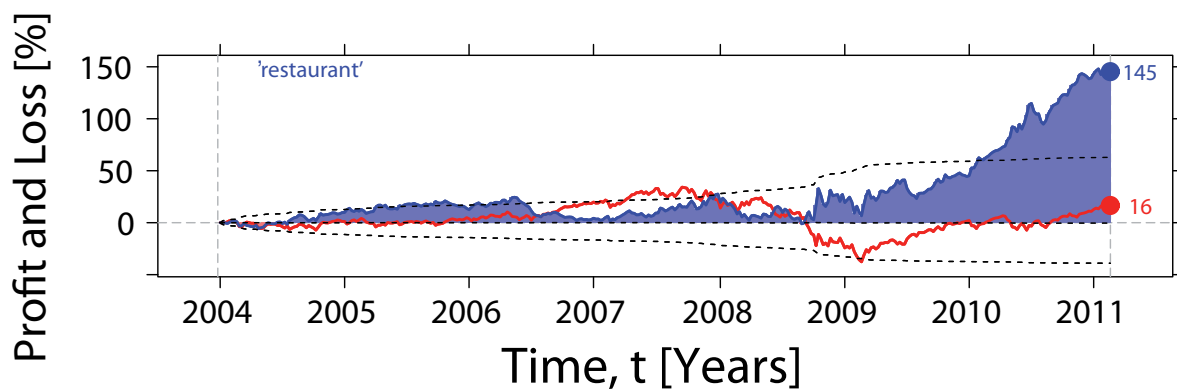

**Figure S79.** Profit and loss for an investment strategy based on the volume of the search term *restaurant* with  $\Delta t = 3$  weeks.

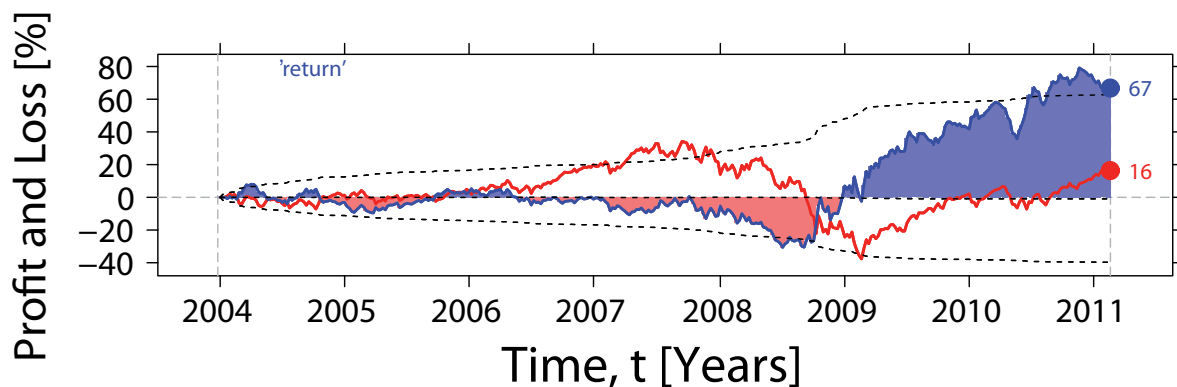

**Figure S80.** Profit and loss for an investment strategy based on the volume of the search term *return* with  $\Delta t = 3$  weeks.

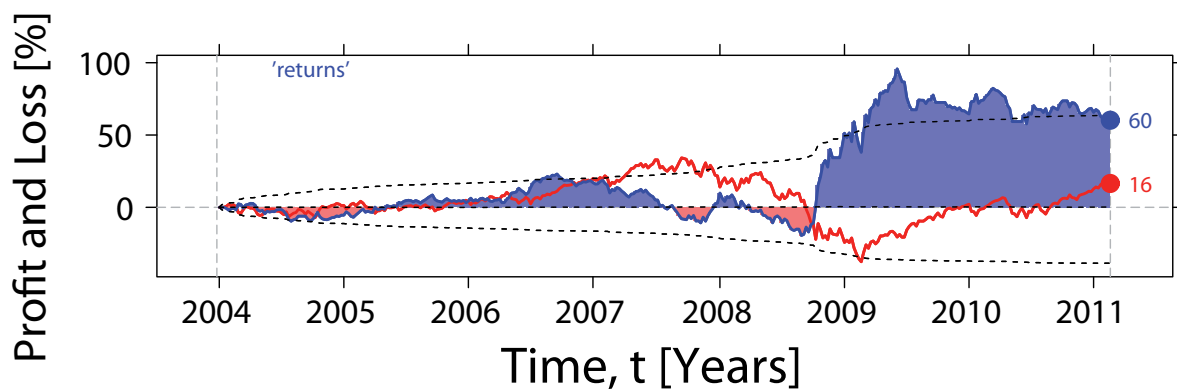

**Figure S81.** Profit and loss for an investment strategy based on the volume of the search term *returns* with  $\Delta t = 3$  weeks.

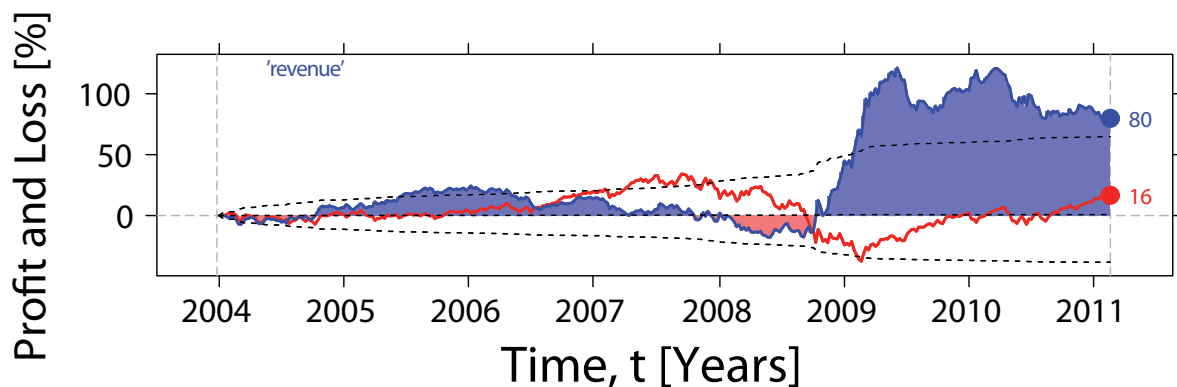

**Figure S82.** Profit and loss for an investment strategy based on the volume of the search term *revenue* with  $\Delta t = 3$  weeks.

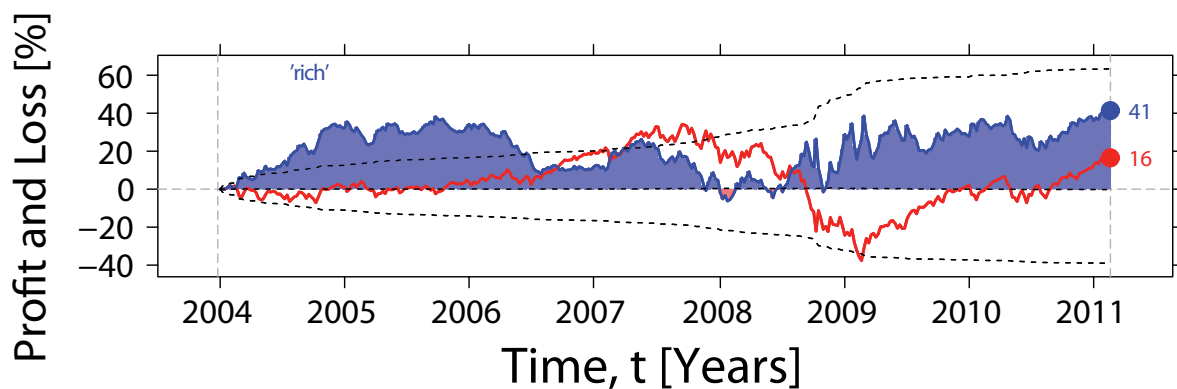

**Figure S83.** Profit and loss for an investment strategy based on the volume of the search term *rich* with  $\Delta t = 3$  weeks.

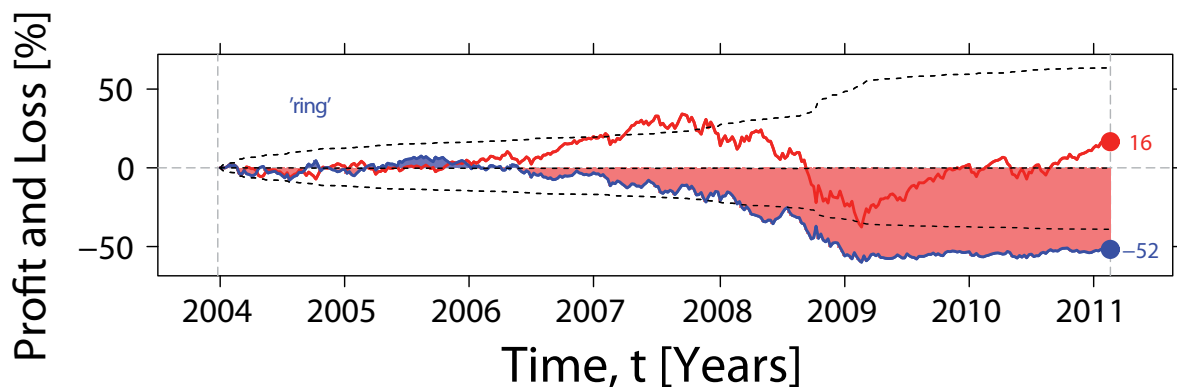

**Figure S84.** Profit and loss for an investment strategy based on the volume of the search term *ring* with  $\Delta t = 3$  weeks.

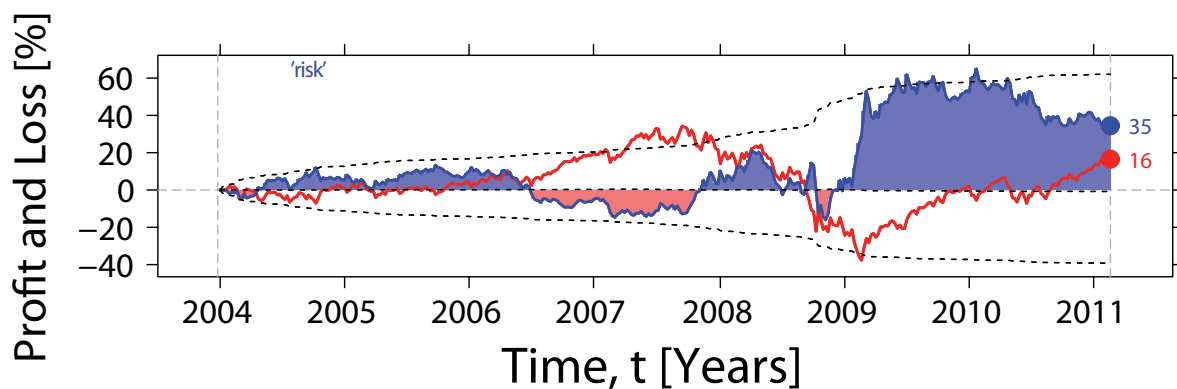

**Figure S85.** Profit and loss for an investment strategy based on the volume of the search term *risk* with  $\Delta t = 3$  weeks.

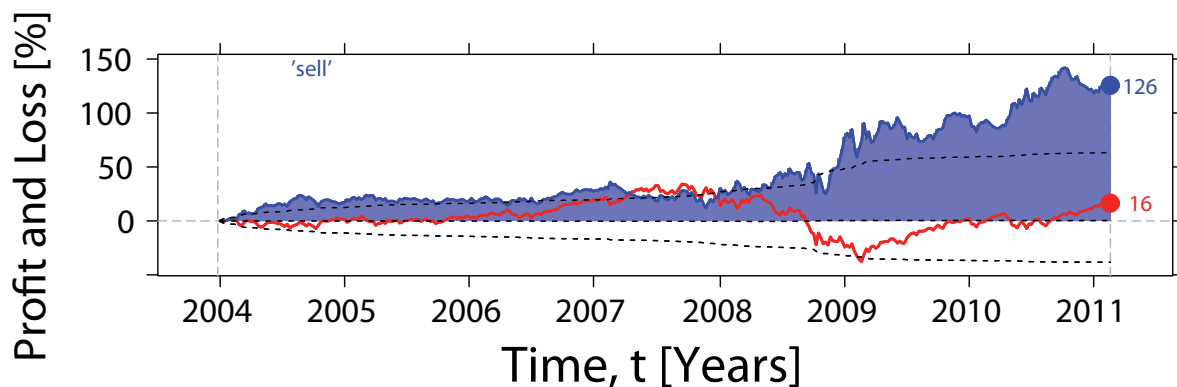

**Figure S86.** Profit and loss for an investment strategy based on the volume of the search term *sell* with  $\Delta t = 3$  weeks.

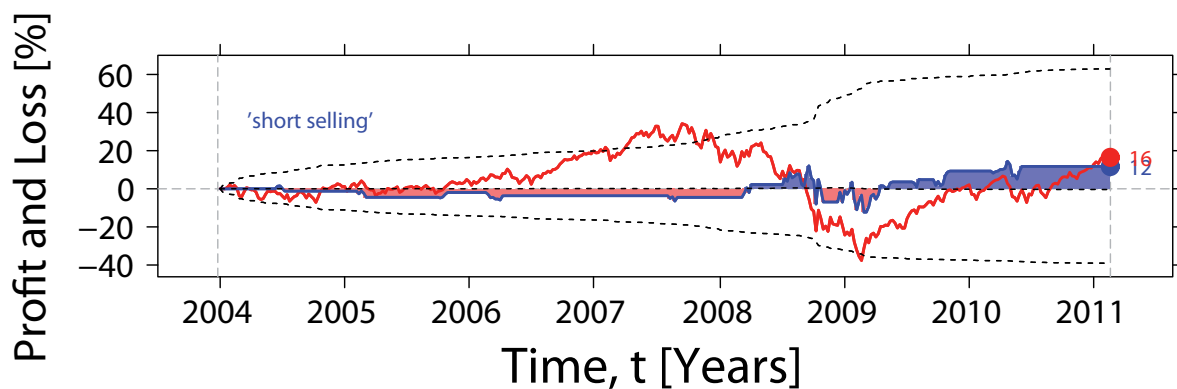

**Figure S87.** Profit and loss for an investment strategy based on the volume of the search term *short selling* with  $\Delta t = 3$  weeks.

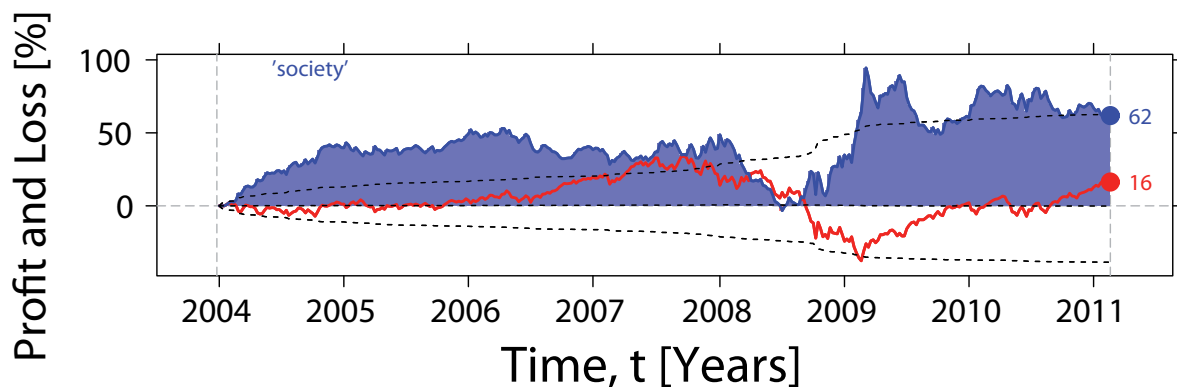

**Figure S88.** Profit and loss for an investment strategy based on the volume of the search term *society* with  $\Delta t = 3$  weeks.

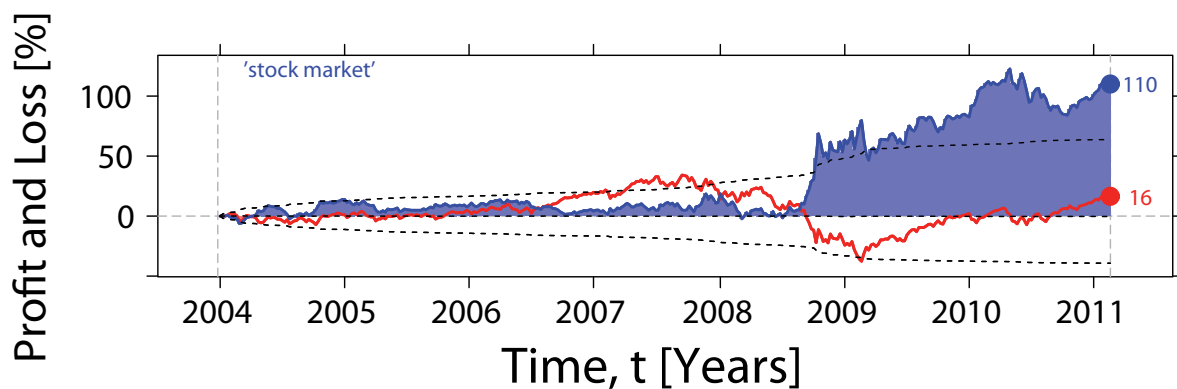

**Figure S89.** Profit and loss for an investment strategy based on the volume of the search term *stock market* with  $\Delta t = 3$  weeks.

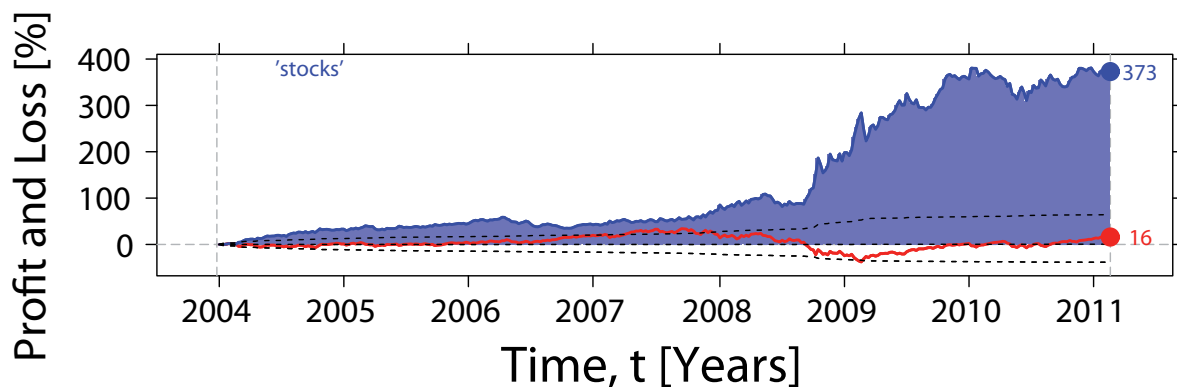

**Figure S90.** Profit and loss for an investment strategy based on the volume of the search term *stocks* with  $\Delta t = 3$  weeks.

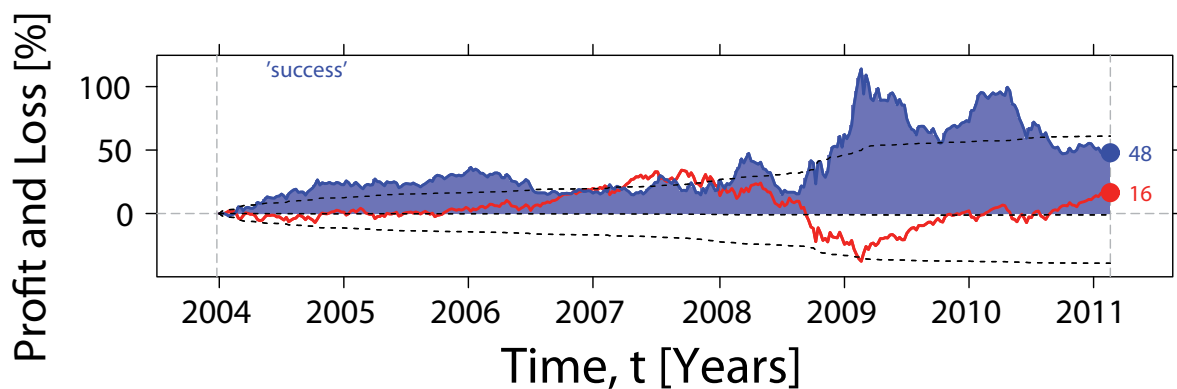

**Figure S91.** Profit and loss for an investment strategy based on the volume of the search term *success* with  $\Delta t = 3$  weeks.

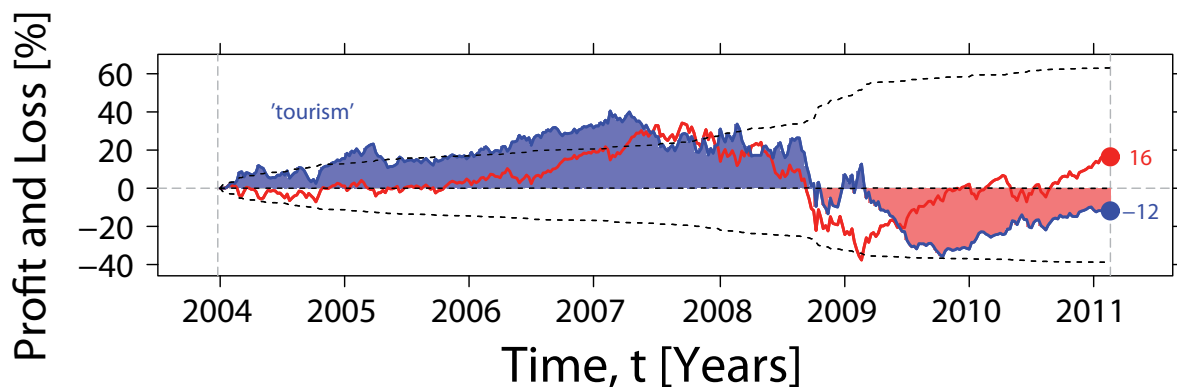

**Figure S92.** Profit and loss for an investment strategy based on the volume of the search term *tourism* with  $\Delta t = 3$  weeks.

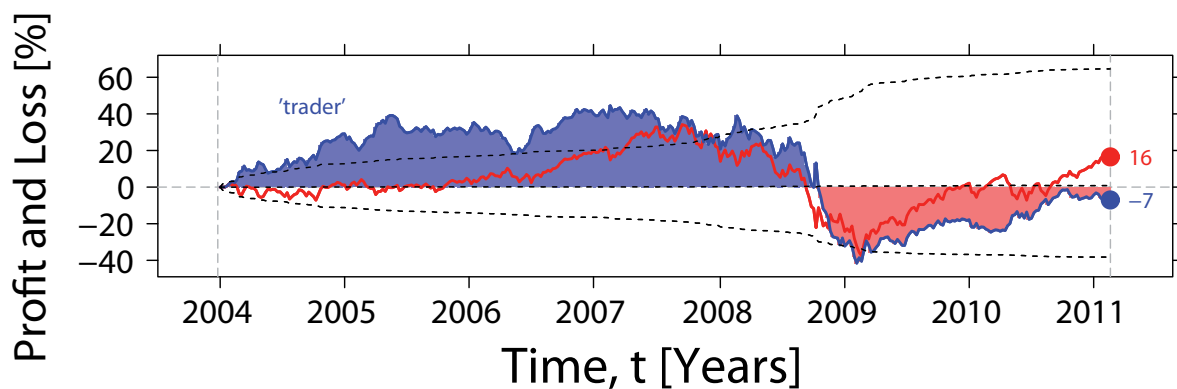

**Figure S93.** Profit and loss for an investment strategy based on the volume of the search term *trader* with  $\Delta t = 3$  weeks.

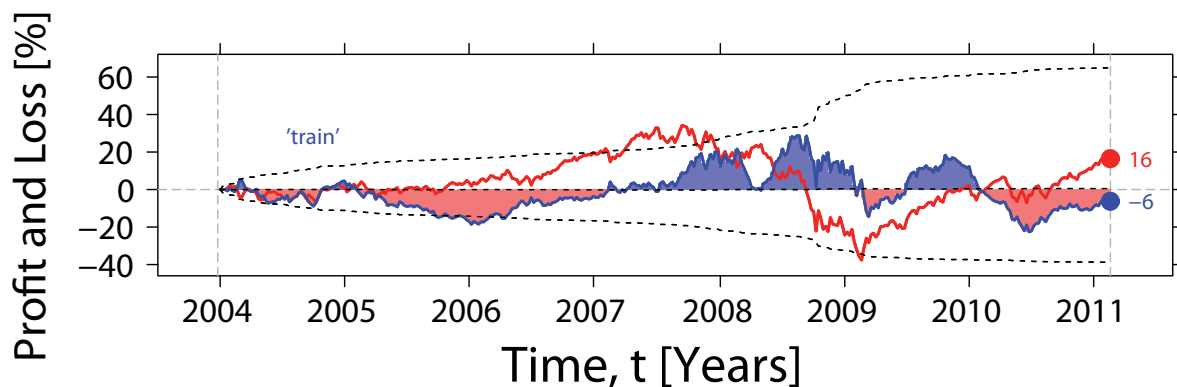

**Figure S94.** Profit and loss for an investment strategy based on the volume of the search term *train* with  $\Delta t = 3$  weeks.

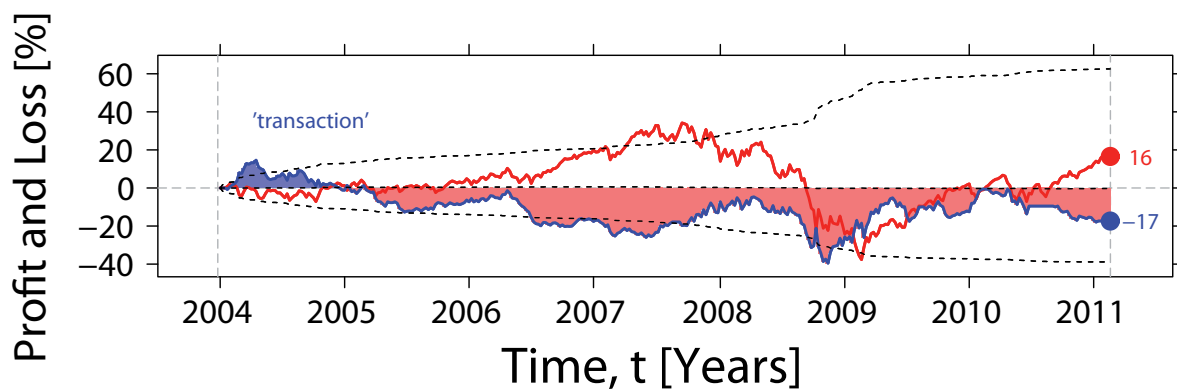

**Figure S95.** Profit and loss for an investment strategy based on the volume of the search term *transaction* with  $\Delta t = 3$  weeks.

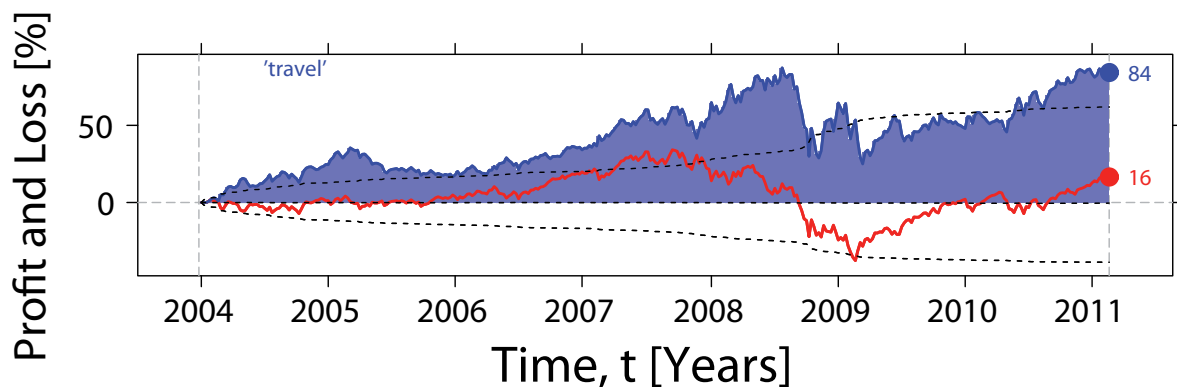

**Figure S96.** Profit and loss for an investment strategy based on the volume of the search term *travel* with  $\Delta t = 3$  weeks.

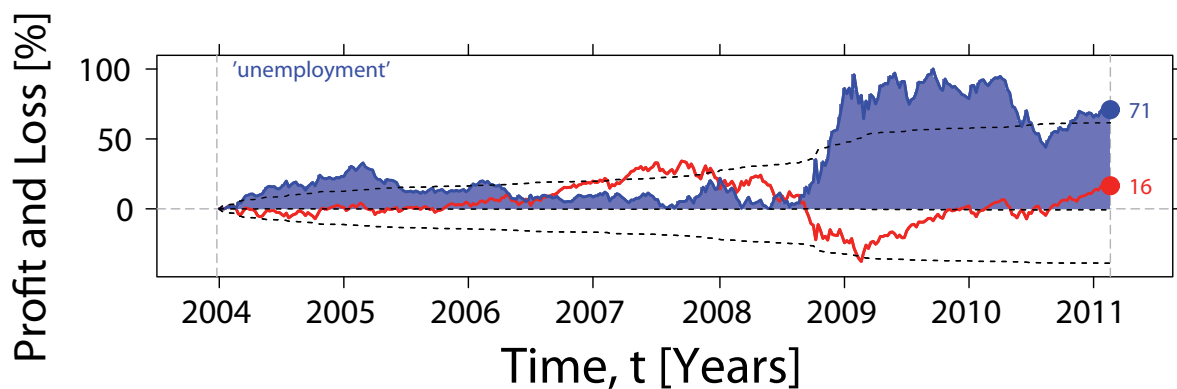

**Figure S97.** Profit and loss for an investment strategy based on the volume of the search term *unemployment* with  $\Delta t = 3$  weeks.

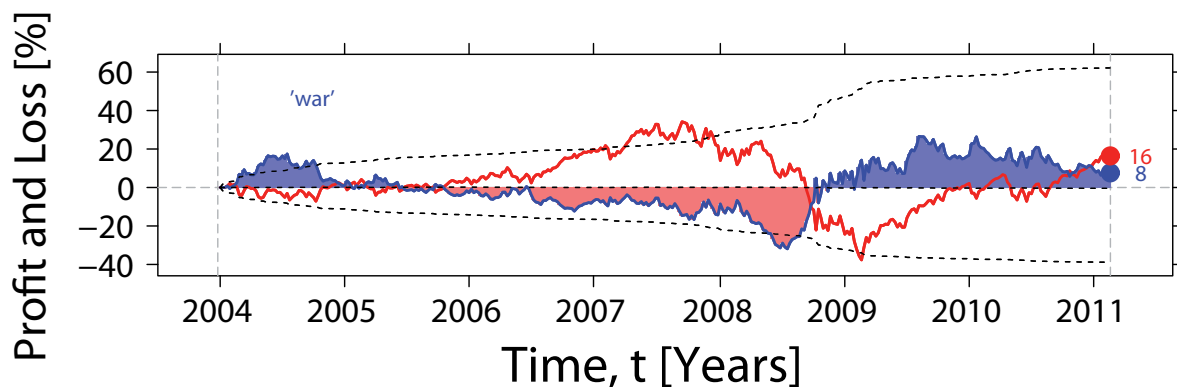

**Figure S98.** Profit and loss for an investment strategy based on the volume of the search term *war* with  $\Delta t = 3$  weeks.

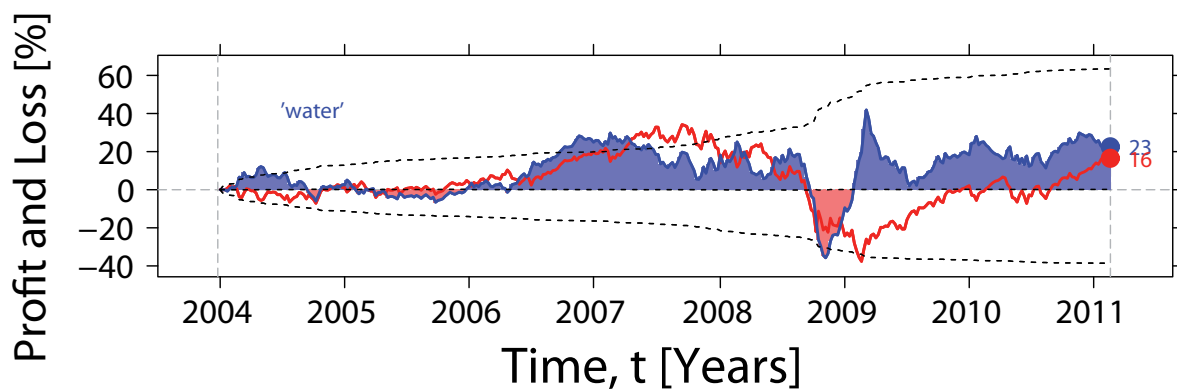

**Figure S99.** Profit and loss for an investment strategy based on the volume of the search term *water* with  $\Delta t = 3$  weeks.

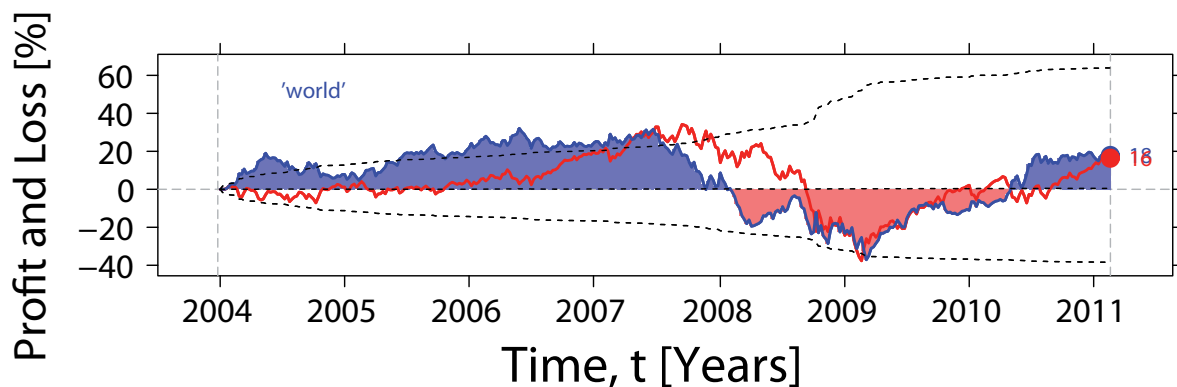

**Figure S100.** Profit and loss for an investment strategy based on the volume of the search term *world* with  $\Delta t = 3$  weeks.

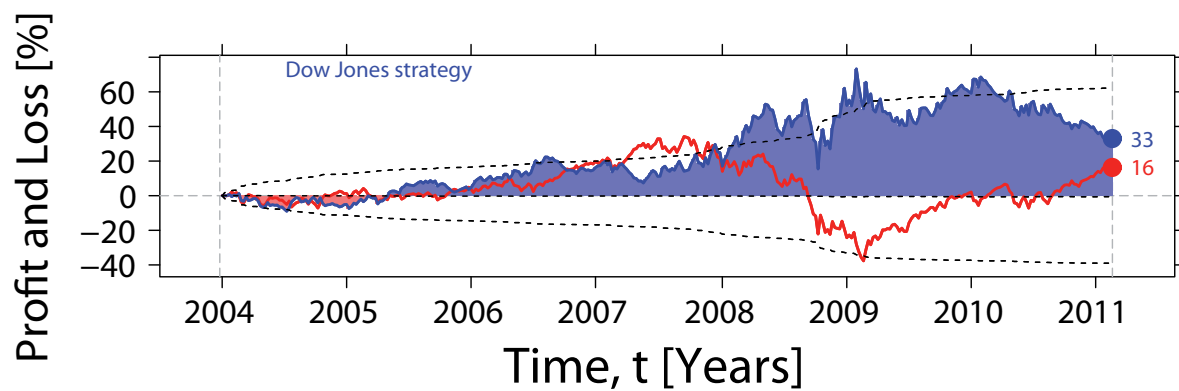

**Figure S101.** Profit and loss for the Dow Jones strategy, using changes in  $p(t)$  in place of changes in search volume data as the basis of buy and sell decisions, with  $\Delta t = 3$  weeks.
